# Supplementary material for: Glucose Levels Alter the Mga Virulence Regulon in the Group A Streptococcus
Source: PubMed Central journal article supplement (PMC5862849; doi:10.1038/s41598-018-23366-7), 2018-03-21
Supplement: 41598_2018_23366_MOESM1_ESM.pdf [file 41598_2018_23366_MOESM1_ESM.pdf]

**Supplementary Materials for:**

**Glucose Levels Alter the Mga Virulence Regulon in the Group A  
Streptococcus**

Kayla M. Valdes<sup>1</sup>, Ganesh S. Sundar<sup>1</sup>, Ashton T. Belew<sup>2</sup>, Emrul Islam<sup>1</sup>, Najib M. El-Sayed<sup>1,2</sup>, Yoann  
Le Breton<sup>1</sup>, and Kevin S. McIver<sup>1</sup>

<sup>1</sup>Department of Cell Biology & Molecular Genetics and Maryland Pathogen Research Institute,  
University of Maryland, College Park (UMCP), College Park, Maryland, USA; <sup>2</sup>Center for  
Bioinformatics and Computation Biology, UMCP, MD USA

## **Supplementary Materials Contents:**

**Supplemental Figures.** Following six (6) figures are included:

**Figure S1.** Transcriptomic landscape of M1T1 5448 during growth in C media compared to THY.

**Figure S2.** Clustering of WT 5448 samples based on RNA-seq data.

**Figure S3.** Confirmation of THY RNA-Seq results for Mga regulon using qPCR.

**Figure S4.** Confirmation of C media RNA-Seq results for Mga regulon using qPCR.

**Figure S5.** Sda1 levels are reduced in  $\Delta mga$  M1T1 GAS supernatants grown in C media.

**Figure S6.** Media-dependent transcriptional regulation by Mga is recapitulated in an independent 5448  $\Delta mga$  mutant.

**Supplemental Tables.** Following three (3) tables are included:

**Table S1.** Genes in 5448 differentially expressed (DE) in THY compared to C Media

**Table S2.** RNA-Seq results of the *mga* mutant in THY (WT/ $\Delta mga$ )

**Table S3.** RNA-Seq results of the *mga* mutant in C Media (WT/ $\Delta mga$ )

**Table S4.** PCR primers used in this study

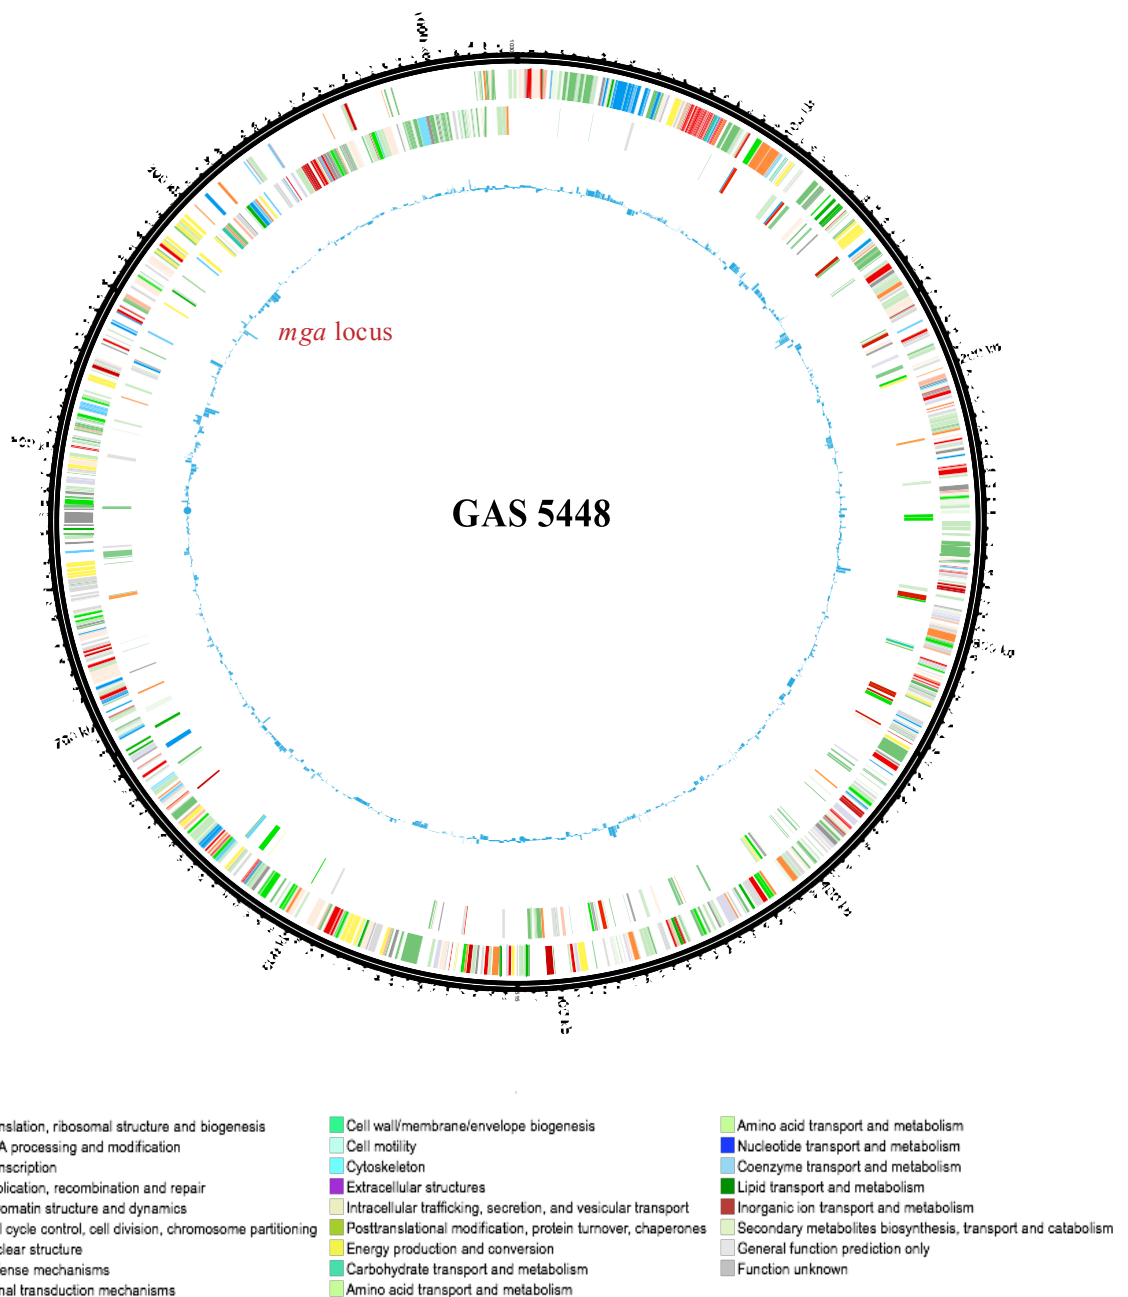

**Figure S1. Transcriptomic landscape of MIT1 5448 during growth in C media compared to THY.** Circos plot of GAS 5448 differentially expressed (DE) genes during growth in C media (low glucose) versus THY (high glucose) at late logarithmic growth. The outer most ring represents a size ruler and the next two rings represent the GAS open reading frames on the (+) and (-) strand of the genome, respectively, with color representing function COG category as indicated in legend. The inner ring (blue) shows transcript levels of genes, where the height of the bars represent the  $\log_2$  fold-change in expression in C media vs. THY (inside is down, outside is up). The position of the *mga* locus is indicated.

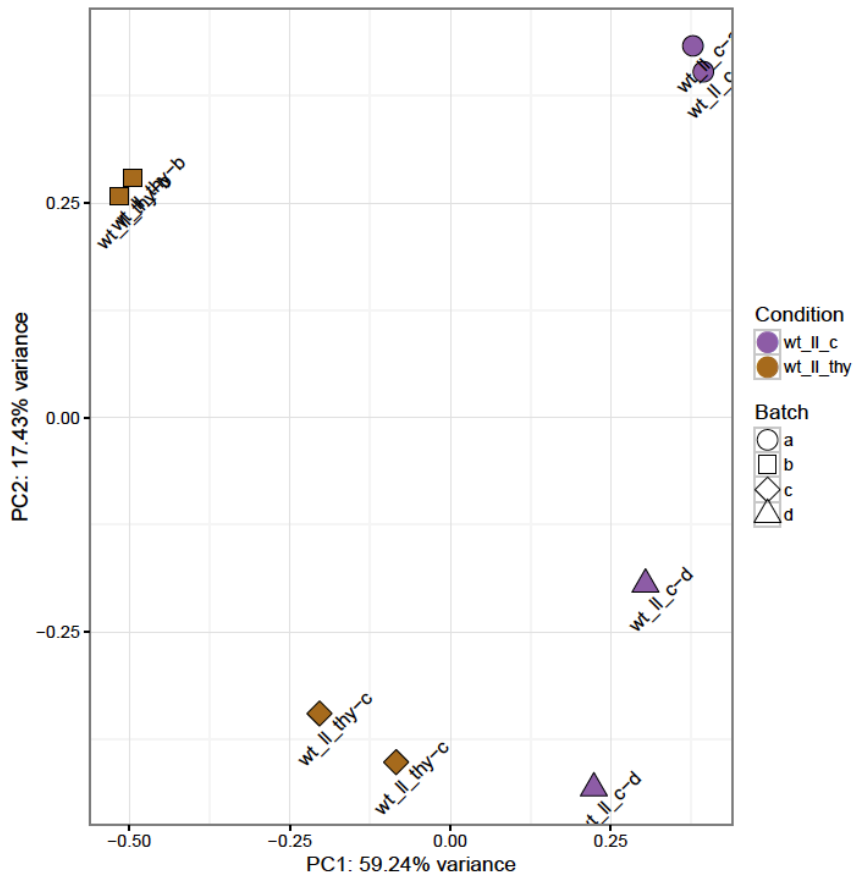

**Figure S2. Clustering of WT 5448 samples based on RNA-seq data.** A principal component analysis (PCA) plot is shown for the  $\log_2$  fold change data of WT 5448 grown in THY (high glucose) or C media (low glucose) at late logarithmic growth phase prior to normalization for batch effects. The PCA plots show the first two principal components on the X and Y axes, respectively, and the percentage of total variance specific to that principle component is indicated. Each biological replicate is represented as a single point with color corresponding to the media condition (THY, brown; C media, purple) and shapes represent different experimental batches.

A.

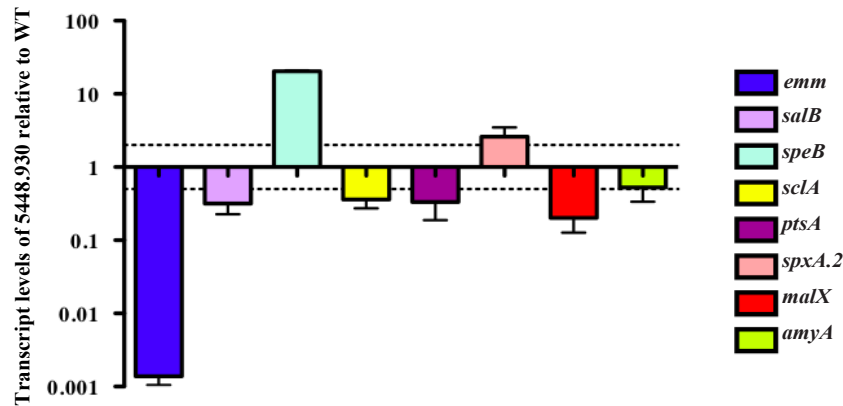

B.

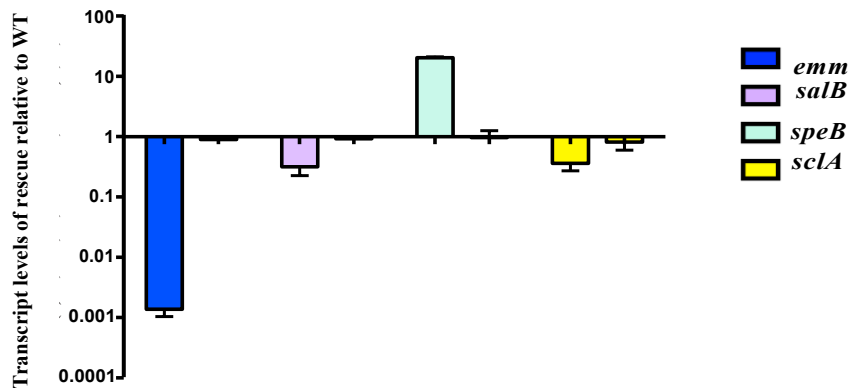

C.

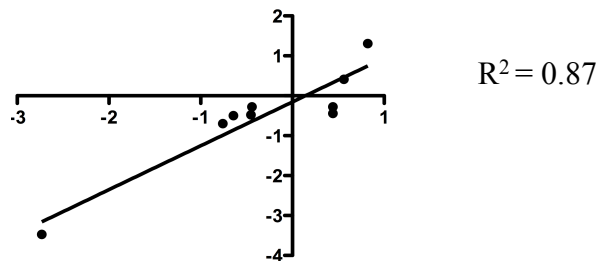

**Figure S3. Confirmation of THY RNA-Seq results for Mga regulon using qPCR.** (A) Transcript levels were determined using qPCR on RNA taken from WT GAS 5448 grown in THY at late-log compared to  $\Delta mga$  5448.930 grown under the same conditions. Error bars represent the standard error from three biological replicates. Differences greater than 2-fold in expression for WT compared to mutant cells (dashed line) were considered significant. (B) Complementation of the  $\Delta mga$  mutant using the rescue strain 5448.930R (hatched bars) restores the transcriptional phenotypes observed in THY. (C) Coefficient of correlation between the RNA-Seq and RT-qPCR results generated a confidence in the data with an  $R^2=87\%$ .

A.

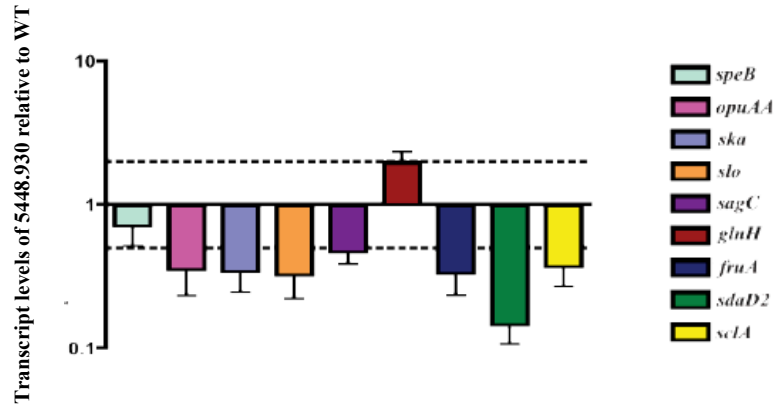

B.

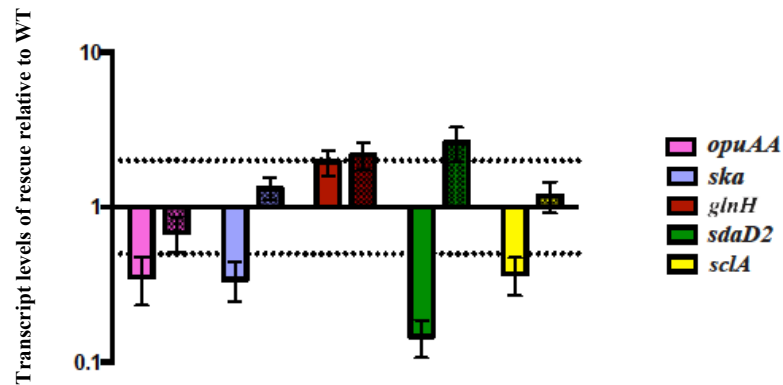

C.

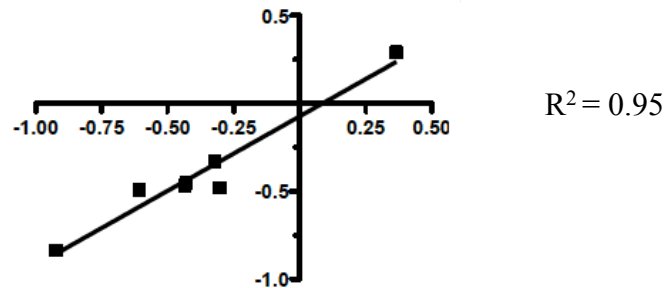

**Figure S4. Confirmation of C media RNA-Seq results for Mga regulon using qPCR.** (A) Transcript levels were determined using qPCR on RNA taken from WT GAS 5448 grown in C media at late-log compared to  $\Delta mga$  5448.930 grown under the same conditions. Error bars represent the standard error from three biological replicates. Differences greater than 2-fold in expression for WT compared to mutant cells (dashed line) were considered significant. (B) Complementation of the  $\Delta mga$  mutant using the rescue strain 5448.930R (hashed bars) restores the transcriptional phenotypes observed in C media. (C) Coefficient of correlation between the RNA-Seq and RT-qPCR results. Generated a confidence in the data with an  $R_2 = 95\%$ .

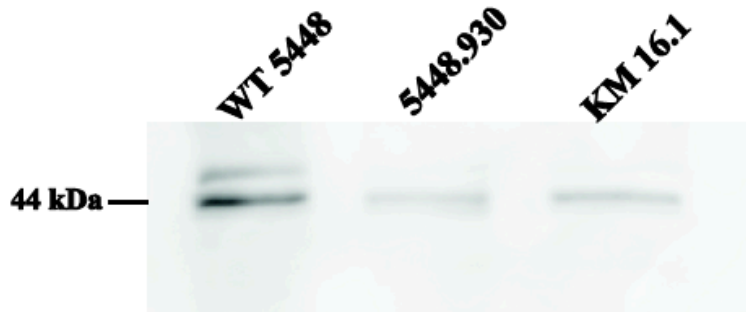

**Figure S5. Sda1 levels are reduced in  $\Delta mga$  MIT1 GAS supernatants grown in C media.** Western blot analysis of 44-kDa Sda1 streptodornase (encoded by *sdaD2*) in culture supernatants grown to late-log phase (Klett ~70) from WT 5448 and two  $\Delta mga$  mutants (5448.930 and KM16.1). Concentrated culture supernatants were isolated as described in Methods and equal amounts were separated by 10% SDS-PAGE, transferred to nitrocellulose, and probed using a polyclonal  $\alpha$ -Sda1 antibody.

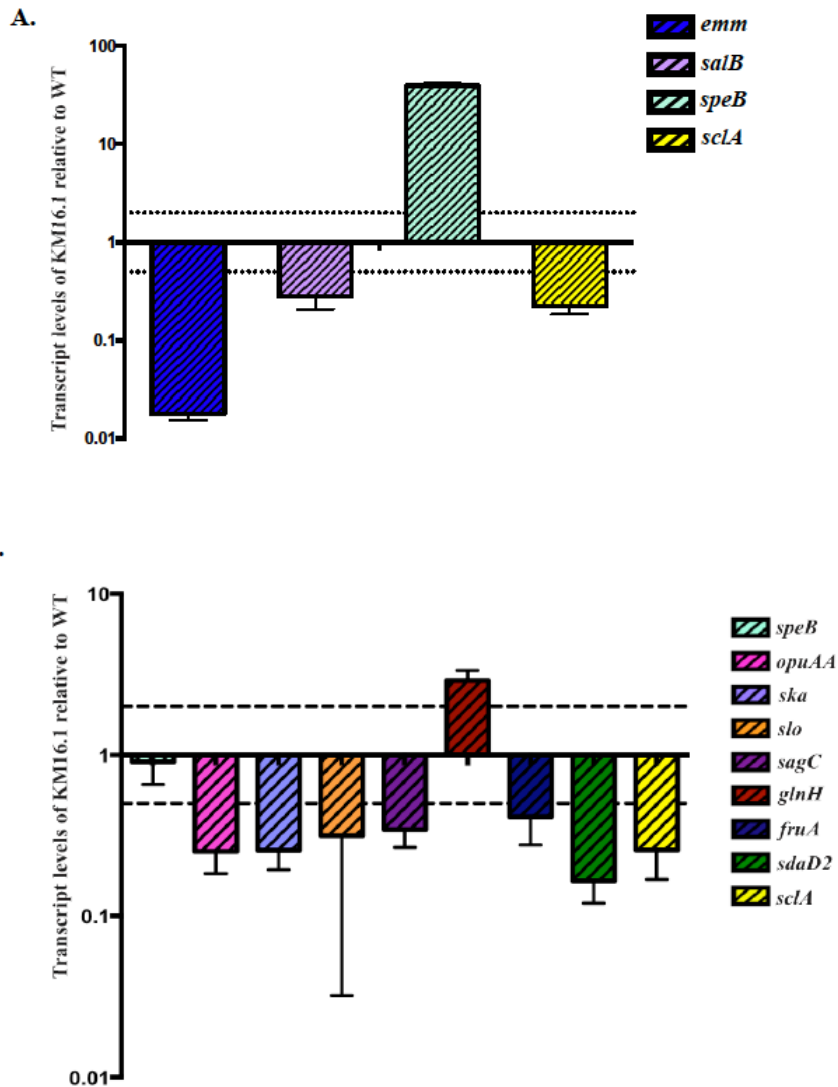

**Figure S6. Media-dependent transcriptional regulation by Mga is recapitulated in an independent 5448  $\Delta$ *mga* mutant.** Transcript levels were determined using qPCR on RNA taken from WT GAS 5448 grown in THY (A) or C media (B) at late-log compared to  $\Delta$ *mga* KM16.1 grown under the same conditions. Error bars represent the standard error from three biological replicates. Differences greater than 2-fold in expression for WT compared to mutant cells (dashed line) were considered significant.



**Supplemental Table S1: Genes in 5448 differentially expressed (DE) in THY compared to C Media**

| Spy Number    | <i>cre</i> (CcpA) <sup>a</sup>  | Annotation                                                 | Gene          | Log <sub>2</sub> FC | <i>p</i> value |
|---------------|---------------------------------|------------------------------------------------------------|---------------|---------------------|----------------|
| M5005_Spy0011 |                                 | tRNA(Ile)-lysidine synthetase                              | <i>tilS</i>   | -1.45               | 2.6E-04        |
| M5005_Spy0017 | (R <sup>2</sup> )               | CHAP-domain-containing cell wall hydrolase; pcsB/sibA      | <i>cdhA</i>   | 2.34                | 7.0E-07        |
| M5005_Spy0019 | <i>cre</i>                      | DNA repair protein                                         | <i>recO</i>   | -1.05               | 1.1E-03        |
| M5005_Spy0022 |                                 | phosphoribosylaminoimidazole-succinocarboxamide synthase   |               | 2.45                | 1.1E-04        |
| M5005_Spy0023 |                                 | phosphoribosylformylglycinamide synthase                   |               | 1.97                | 2.7E-04        |
| M5005_Spy0024 |                                 | amidophosphoribosyltransferase                             | <i>purF</i>   | 2.76                | 1.8E-06        |
| M5005_Spy0025 |                                 | phosphoribosylformylglycinamide cyclo-ligase               | <i>purM</i>   | 2.38                | 1.0E-04        |
| M5005_Spy0026 | <i>cre</i>                      | phosphoribosylaminoimidazolecarboxamide formyltransferase  | <i>purN</i>   | 2.05                | 1.4E-04        |
| M5005_Spy0027 |                                 | cyclohydrolase                                             |               | 2.00                | 2.7E-05        |
| M5005_Spy0029 |                                 | phosphoribosylamine--glycine ligase                        | <i>purD</i>   | 2.21                | 7.2E-04        |
| M5005_Spy0030 |                                 | phosphoribosylaminoimidazole carboxylase catalytic subunit | <i>purE</i>   | 1.63                | 7.6E-03        |
| M5005_Spy0031 |                                 | phosphoribosylaminoimidazole carboxylase ATPase subunit    | <i>purK</i>   | 1.27                | 5.1E-03        |
| M5005_Spy0032 |                                 | hypothetical protein                                       |               | 1.06                | 9.2E-03        |
| M5005_Spy0034 |                                 | transcriptional regulator                                  |               | 1.24                | 3.0E-03        |
| M5005_Spy0035 |                                 | holliday junction DNA helicase                             | <i>ruvB</i>   | 1.46                | 1.5E-04        |
| M5005_Spy0039 | <i>cre2</i> (R <sup>3,4</sup> ) | alcohol dehydrogenase/acetalddehyde dehydrogenase          | <i>adh2</i>   | -2.07               | 6.8E-03        |
| M5005_Spy0040 | <i>cre</i> (R <sup>2,3</sup> )  | alcohol dehydrogenase                                      | <i>adhA</i>   | -1.94               | 2.3E-02        |
| M5005_Spy0041 |                                 | Na <sup>+</sup> driven multidrug efflux pump               |               | -1.03               | 9.0E-03        |
| M5005_Spy0043 |                                 | SSU ribosomal protein S10P                                 | <i>rpsJ</i>   | 1.15                | 2.2E-02        |
| M5005_Spy0044 |                                 | LSU ribosomal protein L3P                                  | <i>rplC</i>   | 1.04                | 1.0E-02        |
| M5005_Spy0052 |                                 | LSU ribosomal protein L29P                                 | <i>rpmC</i>   | 1.54                | 1.0E-02        |
| M5005_Spy0064 |                                 | protein translocase subunit                                | <i>secY</i>   | 1.22                | 7.7E-03        |
| M5005_Spy0065 |                                 | adenylate kinase                                           | <i>adk</i>    | 1.97                | 4.3E-04        |
| M5005_Spy0066 |                                 | bacterial protein translation initiation factor 1          | <i>infA</i>   | 1.54                | 3.7E-04        |
| M5005_Spy0068 |                                 | SSU ribosomal protein S13P                                 | <i>rpsM</i>   | 1.25                | 1.8E-03        |
| M5005_Spy0070 |                                 | DNA-directed RNA polymerase alpha chain                    | <i>rpoA</i>   | 1.49                | 9.2E-04        |
| M5005_Spy0071 |                                 | LSU ribosomal protein L17P                                 | <i>rplQ</i>   | 1.70                | 2.6E-04        |
| M5005_Spy0073 |                                 | hypothetical protein                                       |               | 2.57                | 5.5E-03        |
| M5005_Spy0076 |                                 | 4-diphosphocytidyl-2-C-methyl-D-erythritol kinase          |               | 1.16                | 1.7E-02        |
| M5005_Spy0077 |                                 | transcriptional regulator, MarR family                     | <i>adcR</i>   | 1.09                | 8.8E-05        |
| M5005_Spy0078 |                                 | high-affinity zinc uptake system ATP-binding protein       | <i>adcC</i>   | 1.10                | 1.1E-03        |
| M5005_Spy0085 |                                 | putative DNA binding protein                               |               | 2.62                | 9.1E-06        |
| M5005_Spy0086 | <i>cre</i>                      | comG operon protein 1                                      | <i>comYA</i>  | 2.00                | 5.2E-03        |
| M5005_Spy0088 |                                 | comG operon protein 3                                      | <i>comYC</i>  | 1.76                | 2.4E-03        |
| M5005_Spy0094 | <i>cre</i> (R <sup>2,3</sup> )  | acetate kinase                                             | <i>ackA</i>   | 1.21                | 2.0E-03        |
| M5005_Spy0095 | (R <sup>4</sup> )               | hypothetical protein                                       |               | 2.59                | 1.7E-04        |
| M5005_Spy0106 |                                 | transcriptional regulator; Regulator of protein F          | <i>rofA</i>   | -1.39               | 8.0E-04        |
| M5005_Spy0107 |                                 | fibronectin-binding protein; FCT Pilus Region              | <i>cpa</i>    | 2.50                | 3.8E-07        |
| M5005_Spy0108 |                                 | signal peptidase I; FCT Pilus Region                       | <i>sipA1</i>  | 2.52                | 2.7E-06        |
| M5005_Spy0109 |                                 | fibronectin-binding protein; FCT Pilus Region              |               | 2.37                | 1.0E-04        |
| M5005_Spy0110 |                                 | hypothetical protein                                       | <i>srtC2</i>  | 2.61                | 7.6E-06        |
| M5005_Spy0111 |                                 | hypothetical protein                                       |               | 1.63                | 1.6E-03        |
| M5005_Spy0113 |                                 | transposase                                                |               | 2.14                | 4.2E-03        |
| M5005_Spy0114 |                                 | sortase; FCT Pilus Region                                  | <i>srtB</i>   | 2.59                | 3.0E-04        |
| M5005_Spy0115 |                                 | hypothetical protein                                       |               | -1.26               | 3.9E-04        |
| M5005_Spy0134 |                                 | tellurite resistance protein                               |               | -1.33               | 1.3E-05        |
| M5005_Spy0137 |                                 | nucleoside-binding protein                                 |               | 1.39                | 1.6E-05        |
| M5005_Spy0142 |                                 | hypothetical protein                                       |               | 2.34                | 2.5E-03        |
| M5005_Spy0143 | <i>cre</i>                      | hypothetical protein                                       |               | 3.97                | 1.9E-03        |
| M5005_Spy0148 | <i>cre</i>                      | PTS system, <b>3-keto-L-gulonate</b> specific IIC          | <i>ptxC</i>   | -2.37               | 5.9E-03        |
| M5005_Spy0149 | (R <sup>4</sup> )               | PTS system, <b>3-keto-L-gulonate</b> specific IIB          | <i>ptxB</i>   | -4.53               | 2.0E-05        |
| M5005_Spy0150 | (R <sup>4</sup> )               | PTS system, <b>3-keto-L-gulonate</b> specific IIA          | <i>ptxA</i>   | -4.61               | 3.3E-04        |
| M5005_Spy0151 | (R <sup>2,4</sup> )             | 3-keto-L-gulonate-6-phosphate decarboxylase                |               | -3.52               | 4.3E-03        |
| M5005_Spy0152 |                                 | L-xylulose 5-phosphate 3-epimerase                         |               | -3.57               | 7.4E-04        |
| M5005_Spy0153 |                                 | L-ribulose-5-phosphate 4-epimerase                         | <i>araD</i>   | -5.77               | 3.5E-06        |
| M5005_Spy0154 |                                 | hypothetical protein                                       |               | -3.95               | 5.7E-05        |
| M5005_Spy0156 |                                 | metal-dependent hydrolase                                  |               | -2.14               | 4.0E-04        |
| M5005_Spy0157 | (A <sup>3</sup> )               | glycine betaine transport ATP-binding protein              | <i>opuAA</i>  | 2.11                | 1.7E-07        |
| M5005_Spy0158 |                                 | glycine betaine transport system permease protein          | <i>opuABC</i> | 2.01                | 2.5E-06        |
| M5005_Spy0174 |                                 | hypothetical protein                                       |               | 1.96                | 1.2E-02        |
| M5005_Spy0175 |                                 | queueine tRNA-ribosyltransferase                           | <i>tgt</i>    | 1.06                | 2.1E-03        |
| M5005_Spy0177 |                                 | bioY protein                                               |               | 1.21                | 2.0E-02        |
| M5005_Spy0185 | <i>cre</i>                      | glucose-6-phosphate isomerase                              | <i>pgi</i>    | 1.09                | 3.8E-02        |
| M5005_Spy0192 |                                 | UTP--glucose-1-phosphate uridylyltransferase               | <i>hasC.2</i> | -1.19               | 1.4E-03        |

|               |                                  |                                                               |               |       |         |
|---------------|----------------------------------|---------------------------------------------------------------|---------------|-------|---------|
| M5005_Spy0194 | (R <sup>4</sup> )                | glycerol-3-phosphate dehydrogenase; GAPDH                     | <i>gapA</i>   | -1.27 | 2.1E-04 |
| M5005_Spy0195 |                                  | Heme-sensitive transcriptional repressor, MarR-family         | <i>pejR</i>   | 1.17  | 1.3E-02 |
| M5005_Spy0204 |                                  | TCS-1 histidine kinase FasB                                   | <i>fasB</i>   | 1.10  | 1.4E-03 |
| M5005_Spy0206 |                                  | TCS-1 response regulator FasA                                 | <i>fasA</i>   | 1.13  | 1.0E-02 |
| M5005_Spy0211 |                                  | LSU ribosomal protein L34P                                    | <i>rpmH</i>   | 1.64  | 1.6E-03 |
| M5005_Spy0213 | (R <sup>2,3,4</sup> )            | ABC <b>Sialic Acid</b> ; N-acetylneuraminate-binding protein  |               | -1.98 | 1.6E-03 |
| M5005_Spy0214 | <i>cre</i> (R <sup>2,3,4</sup> ) | ABC <b>Sialic Acid</b> ; N-acetylneuraminate permease protein |               | -2.11 | 5.6E-04 |
| M5005_Spy0215 | (R <sup>2,3,4</sup> )            | ABC <b>Sialic Acid</b> ; N-acetylneuraminate permease protein |               | -1.83 | 3.2E-03 |
| M5005_Spy0216 | (R <sup>2,3,4</sup> )            | hypothetical membrane spanning protein                        |               | -2.87 | 1.1E-04 |
| M5005_Spy0217 | (R <sup>2,3,4</sup> )            | N-acetylneuraminate lyase                                     | <i>nanH</i>   | -1.94 | 3.3E-03 |
| M5005_Spy0218 | (R <sup>3,4</sup> )              | N-acetylmannosamine kinase                                    |               | -1.95 | 2.8E-03 |
| M5005_Spy0221 |                                  | ribonuclease M5                                               |               | 1.31  | 1.8E-03 |
| M5005_Spy0224 |                                  | ribulose-phosphate 3-epimerase                                | <i>rpe</i>    | -1.36 | 1.2E-04 |
| M5005_Spy0230 |                                  | SSU ribosomal protein S12P                                    | <i>rpsL</i>   | 1.71  | 4.2E-04 |
| M5005_Spy0231 |                                  | SSU ribosomal protein S7P                                     | <i>rpsG</i>   | 1.32  | 4.4E-03 |
| M5005_Spy0238 |                                  | putative undecaprenol kinase                                  | <i>bacA</i>   | -1.20 | 1.7E-03 |
| M5005_Spy0241 |                                  | hypothetical cytosolic protein                                | <i>rgpG</i>   | 1.62  | 2.5E-02 |
| M5005_Spy0247 |                                  | D-alanyl-D-alanine carboxypeptidase                           |               | 1.79  | 1.2E-05 |
| M5005_Spy0273 |                                  | ABC transporter permease protein                              |               | 1.32  | 4.4E-02 |
| M5005_Spy0274 | <i>cre</i>                       | branched-chain amino acid transport system carrier protein    | <i>braB</i>   | 4.77  | 5.8E-07 |
| M5005_Spy0275 | <i>cre</i>                       | serine/threonine sodium symporter                             |               | 3.26  | 2.2E-07 |
| M5005_Spy0295 |                                  | 60 kDa inner membrane protein YIDC                            |               | -1.20 | 1.6E-03 |
| M5005_Spy0296 |                                  | acylphosphatase                                               |               | -1.23 | 2.0E-03 |
| M5005_Spy0307 |                                  | DNA integration/recombination/inversion protein               |               | -1.22 | 1.3E-04 |
| M5005_Spy0318 |                                  | pyruvate formate-lyase activating enzyme                      | <i>pflC</i>   | 1.35  | 3.5E-04 |
| M5005_Spy0321 | (R <sup>2</sup> )                | ferrichrome transport system permease protein                 | <i>fhuG</i>   | 1.34  | 5.2E-04 |
| M5005_Spy0323 | (R <sup>2</sup> )                | ferrichrome-binding protein                                   | <i>fhuD</i>   | 1.13  | 7.5E-03 |
| M5005_Spy0324 | (R <sup>2</sup> )                | ferrichrome transport ATP-binding protein                     | <i>fhuA</i>   | 1.85  | 1.2E-04 |
| M5005_Spy0329 |                                  | hypothetical cytosolic protein                                |               | -1.11 | 5.1E-05 |
| M5005_Spy0333 |                                  | signal peptidase-like protein                                 |               | -1.23 | 4.7E-04 |
| M5005_Spy0335 |                                  | corrin/porphyrin methyltransferase                            |               | -0.97 | 1.8E-04 |
| M5005_Spy0336 |                                  | hypothetical membrane associated protein                      |               | -1.13 | 1.0E-02 |
| M5005_Spy0338 |                                  | arsenate reductase family protein                             |               | 1.24  | 1.3E-03 |
| M5005_Spy0341 | <i>cre</i>                       | lactocepin; SpyCEP; ScpC; IL-8 protease                       | <i>spyCEP</i> | -1.78 | 1.4E-04 |
| M5005_Spy0346 | (R <sup>2</sup> )                | hypothetical protein                                          |               | -1.41 | 2.8E-02 |
| M5005_Spy0347 | (R <sup>2</sup> )                | ribonucleoside-diphosphate reductase beta chain               | <i>nrdF.1</i> | -1.25 | 2.0E-03 |
| M5005_Spy0348 | (R <sup>2</sup> )                | hypothetical protein                                          | <i>nrdI</i>   | -1.49 | 5.0E-03 |
| M5005_Spy0349 | (R <sup>2</sup> )                | ribonucleoside-diphosphate reductase alpha chain              | <i>nrdE.1</i> | -1.56 | 4.3E-03 |
| M5005_Spy0361 | <i>cre</i> (R <sup>2,4</sup> )   | phosphoglycerate transporter protein                          |               | -1.05 | 3.3E-02 |
| M5005_Spy0374 |                                  | LSU ribosomal protein L11P                                    | <i>rplK</i>   | 1.84  | 4.9E-03 |
| M5005_Spy0375 |                                  | LSU ribosomal protein L1P                                     | <i>rplA</i>   | 1.86  | 3.2E-03 |
| M5005_Spy0385 | <i>cre</i>                       | 67 kDa Myosin-crossreactive antigen                           |               | -1.23 | 5.2E-03 |
| M5005_Spy0387 |                                  | uracil DNA glycosylase superfamily protein                    |               | -0.98 | 1.3E-02 |
| M5005_Spy0398 |                                  | bacteriocin                                                   |               | 1.53  | 4.0E-02 |
| M5005_Spy0421 |                                  | lactoylglutathione lyase                                      | <i>gloA</i>   | -1.70 | 1.2E-05 |
| M5005_Spy0422 |                                  | NAD(P)H-dependent quinone reductase                           |               | -1.94 | 4.0E-06 |
| M5005_Spy0423 | <i>cre2</i>                      | Xaa-Pro dipeptidase                                           | <i>pepQ</i>   | -1.61 | 1.8E-04 |
| M5005_Spy0425 |                                  | glycosyltransferase                                           |               | -1.29 | 2.1E-04 |
| M5005_Spy0426 |                                  | 1,2-diacylglycerol 3-glucosyltransferase                      |               | -1.52 | 2.8E-04 |
| M5005_Spy0457 |                                  | plasmid stabilization system protein                          |               | -1.08 | 2.5E-02 |
| M5005_Spy0461 |                                  | hypothetical cytosolic protein                                |               | -1.67 | 1.6E-04 |
| M5005_Spy0462 |                                  | hypothetical protein                                          |               | -1.50 | 6.6E-03 |
| M5005_Spy0463 |                                  | hypothetical cytosolic protein                                |               | -1.13 | 5.4E-03 |
| M5005_Spy0464 |                                  | microcin C7 self-immunity protein                             | <i>mccF</i>   | -1.14 | 1.3E-03 |
| M5005_Spy0465 |                                  | hypothetical protein                                          |               | -0.95 | 1.5E-02 |
| M5005_Spy0466 |                                  | hypothetical protein                                          |               | -1.43 | 2.9E-05 |
| M5005_Spy0467 |                                  | transposase                                                   |               | -1.09 | 2.8E-02 |
| M5005_Spy0469 |                                  | hypothetical protein                                          |               | -1.74 | 9.1E-04 |
| M5005_Spy0473 |                                  | multidrug resistance protein B                                |               | 1.46  | 1.4E-03 |
| M5005_Spy0474 | (R <sup>2,3,4</sup> )            | transcription antiterminator, BglG family                     | <i>licT</i>   | 2.43  | 7.5E-05 |
| M5005_Spy0475 | <i>cre</i> (R <sup>2,3,4</sup> ) | PTS system, <b>b-Glucoside</b> -specific IIABC                |               | 3.78  | 2.7E-08 |
| M5005_Spy0476 | (R <sup>2,3,4</sup> )            | 6-phospho-beta-glucosidase                                    | <i>bglA</i>   | 2.94  | 4.4E-06 |
| M5005_Spy0477 |                                  | hypothetical membrane spanning protein                        |               | -1.67 | 3.6E-05 |
| M5005_Spy0478 |                                  | hypothetical membrane spanning protein                        |               | -1.65 | 3.7E-04 |
| M5005_Spy0479 |                                  | hypothetical membrane spanning protein                        |               | -3.11 | 5.0E-02 |
| M5005_Spy0483 |                                  | stress-responsive transcriptional regulator                   |               | -2.31 | 4.4E-08 |
| M5005_Spy0485 |                                  | prolipoprotein diacylglyceryl transferase                     | <i>lgt</i>    | -0.96 | 5.6E-04 |
| M5005_Spy0486 |                                  | hypothetical protein                                          |               | -1.21 | 3.0E-03 |
| M5005_Spy0496 |                                  | hydrolase, HAD superfamily                                    |               | 1.90  | 5.5E-06 |

|               |                       |                                                         |               |       |         |
|---------------|-----------------------|---------------------------------------------------------|---------------|-------|---------|
| M5005_Spy0503 |                       | glutathione peroxidase                                  |               | -1.45 | 1.2E-04 |
| M5005_Spy0504 |                       | oligoendopeptidase F                                    | <i>pepF</i>   | -1.70 | 1.0E-05 |
| M5005_Spy0512 | <i>cre</i>            | hydrolase, HAD superfamily                              |               | -1.02 | 8.9E-05 |
| M5005_Spy0523 |                       | hypothetical protein                                    |               | -1.63 | 2.3E-02 |
| M5005_Spy0528 |                       | glucose-1-phosphate phosphodismutase                    |               | -1.13 | 1.2E-03 |
| M5005_Spy0539 |                       | ATP-binding protein                                     |               | -1.30 | 2.2E-05 |
| M5005_Spy0540 |                       | transporter                                             |               | -1.27 | 4.1E-04 |
| M5005_Spy0541 |                       | hypothetical cytosolic protein                          |               | -1.50 | 6.2E-05 |
| M5005_Spy0542 |                       | dipeptidase                                             | <i>pepD</i>   | -1.77 | 8.8E-05 |
| M5005_Spy0543 | <i>cre2</i>           | high-affinity zinc uptake system protein znuA precursor |               | 1.49  | 3.5E-03 |
| M5005_Spy0545 |                       | galactosamine-6-phosphate deaminase (isomerizing)       | <i>agaS</i>   | -0.93 | 1.5E-02 |
| M5005_Spy0546 |                       | LSU ribosomal protein L31P                              | <i>rpmE</i>   | 1.77  | 5.0E-06 |
| M5005_Spy0549 | <i>cre</i>            | chorismate mutase                                       |               | 1.13  | 1.0E-02 |
| M5005_Spy0551 |                       | LSU ribosomal protein L19P                              | <i>rplS</i>   | 2.14  | 4.6E-05 |
| M5005_Spy0555 |                       | hypothetical cytosolic protein                          |               | -1.40 | 7.8E-04 |
| M5005_Spy0558 |                       | transposase                                             |               | -1.01 | 4.6E-02 |
| M5005_Spy0562 | (R <sup>2,3,4</sup> ) | streptolysin S precursor                                | <i>sagA</i>   | -2.37 | 2.1E-04 |
| M5005_Spy0563 | (R <sup>2,3,4</sup> ) | streptolysin S biosynthesis protein                     | <i>sagB</i>   | -1.86 | 1.9E-04 |
| M5005_Spy0564 | (R <sup>2,3,4</sup> ) | streptolysin S biosynthesis protein                     | <i>sagC</i>   | -1.87 | 1.0E-04 |
| M5005_Spy0565 | (R <sup>2,3,4</sup> ) | streptolysin S biosynthesis protein                     | <i>sagD</i>   | -1.25 | 1.9E-03 |
| M5005_Spy0566 | (R <sup>2,3,4</sup> ) | streptolysin S putative self-immunity protein           | <i>sagE</i>   | -2.32 | 5.5E-05 |
| M5005_Spy0567 | (R <sup>2,3,4</sup> ) | streptolysin S biosynthesis protein                     | <i>sagF</i>   | -1.82 | 1.0E-03 |
| M5005_Spy0568 | (R <sup>2,3,4</sup> ) | streptolysin S export ATP-binding protein               | <i>sagG</i>   | -1.88 | 7.7E-05 |
| M5005_Spy0569 | (R <sup>2,3,4</sup> ) | streptolysin S export transmembrane protein             | <i>sagH</i>   | -1.76 | 1.9E-04 |
| M5005_Spy0570 | (R <sup>2,3,4</sup> ) | streptolysin S export transmembrane protein             | <i>sagI</i>   | -1.14 | 2.7E-02 |
| M5005_Spy0575 |                       | ATP synthase C chain                                    | <i>atpE</i>   | 1.60  | 1.4E-04 |
| M5005_Spy0576 | (A <sup>3</sup> )     | ATP synthase A chain                                    | <i>atpB</i>   | 1.26  | 1.7E-03 |
| M5005_Spy0579 | (A <sup>3</sup> )     | ATP synthase alpha chain                                | <i>atpA</i>   | 1.43  | 2.0E-02 |
| M5005_Spy0593 |                       | neutral zinc metallopeptidase family                    |               | -1.35 | 7.7E-05 |
| M5005_Spy0594 |                       | ATP-dependent nuclease subunit B                        | <i>rexB</i>   | -1.18 | 6.8E-04 |
| M5005_Spy0595 |                       | ATP-dependent nuclease subunit A                        | <i>rexA</i>   | -1.26 | 4.1E-04 |
| M5005_Spy0597 |                       | SSU ribosomal protein S21P                              |               | 1.39  | 1.1E-03 |
| M5005_Spy0611 |                       | Group A Carbohydrate; Membrane protein                  | <i>gacJ</i>   | -1.02 | 8.6E-03 |
| M5005_Spy0615 |                       | pore forming protein                                    | <i>epsA</i>   | -1.66 | 3.5E-04 |
| M5005_Spy0616 |                       | ferredoxin                                              |               | -1.78 | 4.7E-02 |
| M5005_Spy0618 |                       | cytidylate kinase                                       | <i>cmk</i>    | -1.08 | 4.3E-04 |
| M5005_Spy0619 |                       | bacterial protein translation initiation factor 3       | <i>infC</i>   | 2.03  | 4.4E-04 |
| M5005_Spy0620 | <i>cre</i>            | LSU ribosomal protein L35P                              | <i>rpl36</i>  | 1.93  | 2.3E-03 |
| M5005_Spy0621 |                       | LSU ribosomal protein L20P                              | <i>rplT</i>   | 2.34  | 1.2E-05 |
| M5005_Spy0624 |                       | 3-dehydroquinone dehydratase                            | <i>aroD</i>   | 1.25  | 4.3E-04 |
| M5005_Spy0625 |                       | chorismate synthase                                     | <i>aroF</i>   | 1.20  | 5.5E-03 |
| M5005_Spy0628 |                       | folylpolyglutamate synthase/dihydrofolate synthase      | <i>folC.2</i> | -1.18 | 1.5E-04 |
| M5005_Spy0633 |                       | LSU ribosomal protein L21P                              | <i>rplU</i>   | 1.84  | 3.9E-05 |
| M5005_Spy0634 |                       | hypothetical ribosome-associated protein                |               | 1.05  | 1.4E-03 |
| M5005_Spy0635 |                       | LSU ribosomal protein L27P                              | <i>rpmA</i>   | 2.05  | 2.7E-05 |
| M5005_Spy0636 |                       | transcriptional regulator, LysR family                  |               | -1.36 | 2.0E-05 |
| M5005_Spy0637 |                       | lipoprotein signal peptidase                            | <i>lsp</i>    | -1.45 | 5.0E-05 |
| M5005_Spy0638 |                       | ribosomal large subunit pseudouridine synthase D        |               | -1.21 | 1.1E-05 |
| M5005_Spy0639 |                       | pyrR bifunctional protein                               | <i>pyrR</i>   | 1.57  | 1.6E-03 |
| M5005_Spy0640 |                       | uracil permease                                         | <i>pyrP</i>   | 1.30  | 5.0E-03 |
| M5005_Spy0641 |                       | aspartate carbamoyltransferase                          | <i>pyrB</i>   | 2.18  | 1.7E-05 |
| M5005_Spy0642 |                       | carbamoyl-phosphate synthase small chain                | <i>carA</i>   | 1.73  | 3.8E-04 |
| M5005_Spy0643 |                       | carbamoyl-phosphate synthase large chain                | <i>carB</i>   | 1.62  | 1.6E-03 |
| M5005_Spy0648 |                       | SSU ribosomal protein S16P                              | <i>rpsP</i>   | 1.74  | 4.3E-04 |
| M5005_Spy0649 |                       | RNA binding protein                                     |               | 1.59  | 7.4E-05 |
| M5005_Spy0651 | (R <sup>2</sup> )     | Heme-utilization cell surface protein                   | <i>hupY</i>   | 1.11  | 1.0E-02 |
| M5005_Spy0652 |                       | Heme-oxygenase cytosolic protein                        | <i>hupZ</i>   | 1.76  | 4.9E-04 |
| M5005_Spy0653 | <i>cre</i>            | cobalt-zinc-cadmium resistance protein                  | <i>czcD</i>   | -3.16 | 3.4E-05 |
| M5005_Spy0655 |                       | 16S rRNA processing protein                             | <i>rimM</i>   | 1.25  | 6.3E-04 |
| M5005_Spy0668 |                       | IgG-degrading protease                                  | <i>mac</i>    | 1.82  | 4.0E-03 |
| M5005_Spy0669 |                       | phage protein                                           |               | 1.84  | 3.4E-02 |
| M5005_Spy0676 |                       | hypothetical protein                                    |               | 1.25  | 1.6E-02 |
| M5005_Spy0686 |                       | 3-hydroxy-3-methylglutaryl-coenzyme A reductase         |               | -1.29 | 5.4E-04 |
| M5005_Spy0687 |                       | hydroxymethylglutaryl-CoA synthase                      | <i>mvaS.1</i> | -0.95 | 1.5E-02 |
| M5005_Spy0696 | (R <sup>4</sup> )     | phosphopentomutase                                      | <i>deoB</i>   | -1.00 | 7.2E-03 |
| M5005_Spy0698 | (R <sup>4</sup> )     | purine nucleoside phosphorylase                         | <i>punA</i>   | -1.01 | 2.4E-02 |
| M5005_Spy0703 |                       | orotidine 5'-phosphate decarboxylase                    | <i>pyrF</i>   | 1.62  | 6.4E-03 |
| M5005_Spy0704 |                       | orotate phosphoribosyltransferase                       | <i>pyrE</i>   | 2.61  | 1.4E-03 |
| M5005_Spy0706 |                       | cystine-binding protein                                 |               | 1.67  | 4.8E-05 |

|               |                                              |                                                              |               |       |          |
|---------------|----------------------------------------------|--------------------------------------------------------------|---------------|-------|----------|
| M5005_Spy0707 |                                              | cystine transport system permease protein                    |               | 1.07  | 8.2E-03  |
| M5005_Spy0717 | <i>cre</i>                                   | rhodanese-related sulfurtransferases                         |               | 1.23  | 6.7E-04  |
| M5005_Spy0718 |                                              | hypothetical protein                                         |               | 1.11  | 7.4E-03  |
| M5005_Spy0719 |                                              | glutathione S-transferase                                    |               | 2.40  | 2.2E-06  |
| M5005_Spy0721 |                                              | hypothetical protein                                         |               | -0.99 | 3.2E-02  |
| M5005_Spy0732 |                                              | NIF3-related protein                                         |               | 1.24  | 2.4E-02  |
| M5005_Spy0735 |                                              | dTDP-4-dehydrorhamnose 3,5-epimerase                         | <i>cpsFP</i>  | -1.04 | 8.1E-04  |
| M5005_Spy0737 |                                              | mutator mutT protein/7,8-dihydro-8-oxoguanine-triphosphatase |               | -1.48 | 6.3E-05  |
| M5005_Spy0738 |                                              | hypothetical membrane spanning protein                       |               | -1.64 | 1.7E-06  |
| M5005_Spy0739 |                                              | tetratricopeptide repeat family protein                      |               | -1.19 | 1.2E-03  |
| M5005_Spy0751 |                                              | pyruvate dehydrogenase E1 component alpha subunit            | <i>acoA</i>   | 1.95  | 5.3E-03  |
| M5005_Spy0752 |                                              | pyruvate dehydrogenase E1 component beta subunit             | <i>acoB</i>   | 1.85  | 9.3E-04  |
| M5005_Spy0753 |                                              | dihydrolipoamide acetyltransferase of pyruvate dehydrogenase | <i>acoC</i>   | 1.02  | 5.2E-03  |
| M5005_Spy0774 |                                              | nucleoside diphosphate kinase                                |               | 2.02  | 5.4E-03  |
| M5005_Spy0775 |                                              | nucleoside diphosphate kinase                                |               | 1.61  | 6.3E-04  |
| M5005_Spy0780 | <i>cre</i> (R <sup>2,3,4</sup> )             | PTS system, <b>Mannose/Fructose</b> family IIA component     | <i>ptsA</i>   | 1.51  | 7.6E-03  |
| M5005_Spy0781 | (R <sup>2,3,4</sup> )                        | PTS system, <b>Mannose/Fructose</b> family IIB component     | <i>ptsB</i>   | 1.33  | 1.3E-03  |
| M5005_Spy0783 | (R <sup>2,3,4</sup> )                        | PTS system, <b>Mannose/Fructose</b> family IID component     | <i>ptsD</i>   | 1.12  | 1.0E-02  |
| M5005_Spy0790 | <i>cre</i> (R <sup>3,4</sup> )               | succinate-semialdehyde dehydrogenase                         | <i>gabD</i>   | -1.23 | 1.5E-02  |
| M5005_Spy0791 | (R <sup>4</sup> )                            | excinuclease ABC subunit C                                   | <i>uvrC</i>   | -1.98 | 5.5E-04  |
| M5005_Spy0792 |                                              | NAD(P)H-dependent quinone reductase                          |               | -2.64 | 1.2E-04  |
| M5005_Spy0793 |                                              | Xaa-His dipeptidase                                          |               | -1.74 | 1.8E-02  |
| M5005_Spy0794 |                                              | tRNA (5-carboxymethylaminomethyl-2-thiouridylate) synthase   | <i>thdF</i>   | 2.16  | 4.5E-06  |
| M5005_Spy0795 |                                              | LSU ribosomal protein L10P                                   | <i>rplJ</i>   | 1.52  | 9.0E-03  |
| M5005_Spy0796 |                                              | LSU ribosomal protein L12P                                   | <i>rplL</i>   | 2.69  | 1.0E-03  |
| M5005_Spy0804 |                                              | TCS-6 response regulator; Streptin biosynthesis              | <i>srtR</i>   | -0.94 | 3.6E-04  |
| M5005_Spy0806 |                                              | lantibiotic precursor                                        | <i>srtA</i>   | -1.24 | 2.1E-03  |
| M5005_Spy0807 |                                              | ABC transporter (ATP binding)-lantibiotic associated         | <i>srtT</i>   | -1.63 | 6.4E-06  |
| M5005_Spy0808 |                                              | lantibiotic transport ATP-binding protein                    | <i>srtF</i>   | -0.95 | 3.5E-03  |
| M5005_Spy0809 |                                              | lantibiotic transport permease protein                       | <i>srtE</i>   | -1.98 | 3.8E-05  |
| M5005_Spy0810 |                                              | lantibiotic transport permease protein                       | <i>srtG</i>   | -1.62 | 1.1E-04  |
| M5005_Spy0811 |                                              | transcriptional regulator, Cro/CI family                     |               | -1.29 | 4.6E-02  |
| M5005_Spy0820 |                                              | tetrahydropholate synth./dihydrofolate synthase              | <i>folC.1</i> | -2.04 | 5.6E-08  |
| M5005_Spy0821 | <i>cre2</i>                                  | tetrahydropholate synth., GTP cyclohydrolase I               | <i>folE</i>   | -1.20 | 3.7E-04  |
| M5005_Spy0822 |                                              | tetrahydropholate synth., dihydropteroate synthase           | <i>folP</i>   | -1.11 | 2.1E-02  |
| M5005_Spy0823 |                                              | tetrahydropholate synth., dihydroneopterin aldolase          | <i>folQ</i>   | -1.34 | 3.4E-04  |
| M5005_Spy0824 |                                              | tetrahydropholate synth., pyrophosphokinase                  | <i>folK</i>   | -1.51 | 1.2E-04  |
| M5005_Spy0825 |                                              | UDP-N-acetylenolpyruvoylglucosamine reductase                | <i>murB</i>   | 1.29  | 2.1E-04  |
| M5005_Spy0826 |                                              | spermidine/putrescine transport system ATP-binding protein   | <i>potA</i>   | 2.58  | 4.0E-05  |
| M5005_Spy0827 |                                              | spermidine/putrescine transport system permease protein      | <i>potB</i>   | 1.36  | 7.8E-04  |
| M5005_Spy0828 |                                              | spermidine/putrescine transport system permease protein      | <i>potC</i>   | 1.52  | 4.0E-03  |
| M5005_Spy0829 |                                              | spermidine/putrescine-binding protein                        |               | 2.29  | 3.4E-04  |
| M5005_Spy0835 | <i>cre</i> (R <sup>2,3</sup> )               | class B acid phosphatase                                     |               | -1.26 | 2.4E-03  |
| M5005_Spy0841 |                                              | glutamine amidotransferase, class I                          |               | -1.06 | 2.8 E-03 |
| M5005_Spy0843 |                                              | hypothetical cytosolic protein                               |               | -1.46 | 7.7E-05  |
| M5005_Spy0845 |                                              | ribose-phosphate pyrophosphokinase                           |               | -1.00 | 1.7E-03  |
| M5005_Spy0852 | (R <sup>3,4</sup> )                          | short chain dehydrogenase                                    |               | 2.02  | 1.6E-06  |
| M5005_Spy0853 | (R <sup>3</sup> )                            | short chain dehydrogenase                                    |               | 2.86  | 4.2E-07  |
| M5005_Spy0858 | (A <sup>4</sup> )                            | xanthine phosphoribosyltransferase                           | <i>xpt</i>    | 4.52  | 1.5E-06  |
| M5005_Spy0859 | (A <sup>4</sup> )                            | xanthine permease                                            |               | 4.41  | 1.6E-09  |
| M5005_Spy0873 | <i>cre</i>                                   | L-lactate dehydrogenase                                      | <i>ldh</i>    | 1.60  | 1.4E-03  |
| M5005_Spy0879 |                                              | hypothetical protein                                         |               | -2.03 | 3.5E-04  |
| M5005_Spy0880 |                                              | conserved membrane protein                                   |               | -5.13 | 1.1E-06  |
| M5005_Spy0881 | <i>cre</i>                                   | hypothetical cytosolic protein                               |               | -5.63 | 7.1E-09  |
| M5005_Spy0883 |                                              | ribonuclease HII                                             |               | 1.06  | 3.5 E-05 |
| M5005_Spy0884 |                                              | hypothetical protein                                         | <i>smf</i>    | 2.51  | 1.1E-08  |
| M5005_Spy0890 |                                              | D-lactate dehydrogenase                                      | <i>ddh</i>    | 1.57  | 6.8E-03  |
| M5005_Spy0911 |                                              | hypothetical protein                                         |               | -1.01 | 8.4E-03  |
| M5005_Spy0914 |                                              | phage transcriptional repressor                              |               | 1.30  | 5.0E-03  |
| M5005_Spy0943 | <i>cre</i>                                   | cytidine deaminase                                           | <i>cdd</i>    | 1.42  | 5.4E-04  |
| M5005_Spy0945 | <i>cre</i> (R <sup>4</sup> )                 | pantothenate kinase                                          | <i>coaA</i>   | -1.61 | 4.4E-04  |
| M5005_Spy0965 |                                              | ABC transporter permease protein                             |               | -1.09 | 6.2E-04  |
| M5005_Spy0982 | <i>cre</i> (R <sup>2</sup> ,A <sup>4</sup> ) | histidine-binding protein                                    |               | 1.14  | 1.3E-03  |
| M5005_Spy1017 |                                              | phage protein                                                |               | 3.15  | 6.5E-03  |
| M5005_Spy1023 |                                              | terminase large subunit                                      |               | 1.45  | 3.6E-02  |
| M5005_Spy1028 |                                              | phage protein                                                |               | 3.67  | 1.9E-03  |
| M5005_Spy1046 |                                              | phage protein                                                |               | -1.28 | 5.0E-03  |
| M5005_Spy1062 |                                              | maltodextrose utilization protein                            | <i>malA</i>   | -1.96 | 4.0E-02  |
| M5005_Spy1063 | (R <sup>2,3</sup> )                          | ABC <b>Cyclomaltodextrin</b> permease protein                | <i>malD</i>   | -1.85 | 3.9E-02  |

|               |                                  |                                                              |               |       |         |
|---------------|----------------------------------|--------------------------------------------------------------|---------------|-------|---------|
| M5005_Spy1064 | (R <sup>2,3</sup> )              | ABC <b>Cyclomaltodextrin</b> permease protein                | <i>malC</i>   | -1.57 | 5.1E-02 |
| M5005_Spy1065 | (R <sup>2,3</sup> )              | alpha-amylase                                                | <i>amyA</i>   | -1.70 | 2.9E-02 |
| M5005_Spy1066 | (R <sup>2,3</sup> )              | neopullulanase/cyclomaltodextrinase/maltogenic alpha-amylase | <i>amyB</i>   | -1.65 | 5.4E-02 |
| M5005_Spy1069 | (R <sup>2,3</sup> )              | esterase                                                     |               | -0.99 | 2.8E-03 |
| M5005_Spy1070 |                                  | protein precursor                                            | <i>dltD</i>   | -0.92 | 1.0E-02 |
| M5005_Spy1072 |                                  | protein DltB                                                 | <i>dltB</i>   | -1.47 | 6.7E-05 |
| M5005_Spy1073 |                                  | D-alanine-activating enzyme                                  | <i>dltA</i>   | -1.43 | 1.0E-06 |
| M5005_Spy1074 |                                  | hypothetical protein                                         |               | -1.79 | 3.1E-04 |
| M5005_Spy1075 |                                  | excinuclease ABC subunit B                                   | <i>uvrB</i>   | -1.57 | 6.0E-07 |
| M5005_Spy1079 | (R <sup>2,4</sup> )              | PTS system, <b>Cellobiose</b> -specific IIC component        |               | -2.09 | 3.4E-03 |
| M5005_Spy1080 | (R <sup>2,4</sup> )              | hypothetical protein                                         |               | -1.43 | 6.7E-03 |
| M5005_Spy1081 | (R <sup>2,4</sup> )              | PTS system, <b>Cellobiose</b> -specific IIA component        |               | -1.76 | 8.4E-03 |
| M5005_Spy1082 | (R <sup>2,4</sup> )              | PTS system, <b>Cellobiose</b> -specific IIB component        |               | -1.99 | 4.1E-03 |
| M5005_Spy1083 | <i>cre</i> (R <sup>2,4</sup> )   | PTS system, <b>Cellobiose</b> -specific IIA component        |               | -1.83 | 5.8E-04 |
| M5005_Spy1084 | (R <sup>2,4</sup> )              | outer surface protein                                        |               | -1.25 | 2.2E-02 |
| M5005_Spy1085 | <i>cre</i> (R <sup>4</sup> )     | beta-glucosidase                                             | <i>bglA.2</i> | -1.61 | 6.6E-03 |
| M5005_Spy1093 | <i>cre</i> (R <sup>2,3,4</sup> ) | hypothetical protein                                         |               | -3.31 | 2.3E-06 |
| M5005_Spy1096 |                                  | thioesterase superfamily protein                             |               | 1.85  | 7.6E-03 |
| M5005_Spy1097 |                                  | phosphorylase, Pnp/Udp family                                |               | -0.97 | 2.2E-02 |
| M5005_Spy1100 |                                  | shikimate kinase                                             | <i>aroK</i>   | -1.23 | 4.6E-03 |
| M5005_Spy1102 |                                  | ribonuclease BN                                              |               | -1.46 | 1.7E-04 |
| M5005_Spy1106 | <i>cre</i>                       | protein G-related alpha 2M-binding protein                   | <i>grab</i>   | 1.90  | 7.1E-05 |
| M5005_Spy1107 |                                  | UDP-N-acetylglucosamine 1-carboxyvinyl transferase           | <i>murZ</i>   | 1.34  | 6.5E-03 |
| M5005_Spy1109 |                                  | internalin protein                                           | <i>inlA</i>   | 1.27  | 1.0E-03 |
| M5005_Spy1114 |                                  | hypothetical membrane spanning protein                       |               | -1.93 | 9.0E-04 |
| M5005_Spy1117 |                                  | ATP-dependent RNA helicase                                   | <i>deaD2</i>  | -1.00 | 4.3E-03 |
| M5005_Spy1120 |                                  | phosphoenolpyruvate-protein phosphotransferase               | <i>pstI</i>   | 1.55  | 6.2E-04 |
| M5005_Spy1122 |                                  | glutaredoxin                                                 | <i>nrdH</i>   | -1.87 | 4.9E-05 |
| M5005_Spy1123 |                                  | ribonucleoside-diphosphate reductase alpha chain             | <i>nrdE.2</i> | -1.62 | 1.0E-03 |
| M5005_Spy1124 |                                  | ribonucleoside-diphosphate reductase beta chain              | <i>nrdF.2</i> | -1.07 | 4.8E-03 |
| M5005_Spy1125 |                                  | chloride channel protein                                     |               | -1.59 | 3.1E-06 |
| M5005_Spy1131 |                                  | transcriptional regulator, Cro/CI family                     |               | 2.11  | 3.7E-05 |
| M5005_Spy1132 |                                  | alanyl-tRNA synthetase                                       | <i>alaS</i>   | 2.46  | 9.0E-06 |
| M5005_Spy1137 |                                  | putative competence protein/transcription factor             |               | 1.62  | 2.3E-03 |
| M5005_Spy1139 |                                  | glucosamine-6-phosphate isomerase                            | <i>nagB</i>   | 1.24  | 2.7E-03 |
| M5005_Spy1142 |                                  | hypothetical protein                                         |               | -2.17 | 9.2E-03 |
| M5005_Spy1143 |                                  | hypothetical protein                                         |               | -2.16 | 1.9E-02 |
| M5005_Spy1144 | <i>cre</i>                       | hypothetical protein                                         |               | -2.26 | 1.1E-03 |
| M5005_Spy1149 |                                  | 1-acyl-sn-glycerol-3-phosphate acyltransferase               |               | 1.23  | 3.3E-02 |
| M5005_Spy1152 |                                  | kup system potassium uptake protein                          |               | 1.56  | 3.1E-04 |
| M5005_Spy1167 |                                  | Pb, Cd, Zn and Hg-transporting ATPase                        | <i>pmtA</i>   | 1.43  | 1.9E-03 |
| M5005_Spy1199 |                                  | phage protein                                                |               | 2.11  | 2.8E-02 |
| M5005_Spy1205 |                                  | phage protein                                                |               | 1.51  | 1.0E-02 |
| M5005_Spy1227 |                                  | hypothetical protein                                         |               | 1.08  | 2.6E-03 |
| M5005_Spy1229 |                                  | arginine repressor                                           | <i>argR1</i>  | 1.72  | 7.1E-03 |
| M5005_Spy1230 |                                  | hemolysin                                                    |               | 1.18  | 5.0E-02 |
| M5005_Spy1231 |                                  | dimethylallyltransferase/geranyltranstransferase             | <i>fps</i>    | 1.55  | 1.7E-02 |
| M5005_Spy1232 |                                  | exodeoxyribonuclease VII small subunit                       | <i>xseB</i>   | 2.43  | 1.1E-03 |
| M5005_Spy1237 | (R <sup>2</sup> )                | arginine transport ATP-binding protein                       | <i>artP</i>   | 2.19  | 7.8E-05 |
| M5005_Spy1238 | (R <sup>2</sup> )                | arginine transport system permease protein                   | <i>artQ</i>   | 1.52  | 1.3E-03 |
| M5005_Spy1241 |                                  | mutator protein (7,8-dihydro-8-oxoguanine-triphosphatase)    | <i>mutT</i>   | -0.95 | 2.1E-03 |
| M5005_Spy1256 | (R <sup>4</sup> )                | rhodanese-related sulfurtransferases                         |               | 1.12  | 8.3E-03 |
| M5005_Spy1257 | (R <sup>3</sup> )                | glucokinase/Xylose repressor                                 | <i>glcK</i>   | 1.98  | 2.7E-04 |
| M5005_Spy1258 | <i>cre</i>                       | hypothetical cytosolic protein                               |               | 2.50  | 3.0E-06 |
| M5005_Spy1263 |                                  | hypothetical protein                                         |               | -1.65 | 3.3E-03 |
| M5005_Spy1270 | (R <sup>2,3,4</sup> )            | carbamate kinase                                             | <i>arcC</i>   | -3.88 | 3.1E-05 |
| M5005_Spy1271 | (R <sup>2,3,4</sup> )            | Xaa-His dipeptidase                                          |               | -4.11 | 5.7E-09 |
| M5005_Spy1272 | (R <sup>2,3,4</sup> )            | arginine/ornithine antiporter                                |               | -4.09 | 2.0E-07 |
| M5005_Spy1273 | (R <sup>2,3,4</sup> )            | ornithine carbamoyltransferase                               | <i>arcB</i>   | -4.04 | 3.8E-06 |
| M5005_Spy1274 | (R <sup>2,3,4</sup> )            | acetyltransferase                                            |               | -3.79 | 1.9E-07 |
| M5005_Spy1275 | <i>cre</i> (R <sup>2,3,4</sup> ) | arginine deiminase                                           | <i>arcA</i>   | -3.22 | 2.5E-04 |
| M5005_Spy1281 |                                  | TCS-9 response regulator yesN-like                           | <i>tcs9R</i>  | -0.99 | 1.6E-02 |
| M5005_Spy1297 |                                  | phospho-2-dehydro-3-deoxyheptonate aldolase                  |               | 1.91  | 7.1E-04 |
| M5005_Spy1298 |                                  | 3-dehydroquininate synthase                                  | <i>aroB</i>   | 2.02  | 8.4E-03 |
| M5005_Spy1299 |                                  | hypothetical protein                                         |               | -1.91 | 4.4E-02 |
| M5005_Spy1305 |                                  | TCS-10 response regulator; TCS-X; YesN-like                  | <i>trxR</i>   | -1.20 | 1.4E-02 |
| M5005_Spy1308 |                                  | ABC unknown sugar-binding protein                            |               | -1.79 | 8.8E-03 |
| M5005_Spy1309 |                                  | ABC unknown sugar permease protein                           |               | -2.78 | 7.0E-03 |
| M5005_Spy1310 | <i>cre2</i>                      | ABC unknown sugar permease protein                           |               | -2.82 | 6.2E-03 |

|               |                                  |                                                                |               |       |         |
|---------------|----------------------------------|----------------------------------------------------------------|---------------|-------|---------|
| M5005_Spy1311 | <i>cre</i>                       | glucokinase                                                    |               | -1.95 | 2.4E-03 |
| M5005_Spy1312 |                                  | hypothetical protein                                           |               | -3.23 | 3.4E-03 |
| M5005_Spy1319 |                                  | tRNA (uracil-5-)-methyltransferase                             |               | 1.24  | 2.0E-02 |
| M5005_Spy1323 |                                  | transposase                                                    |               | -1.12 | 2.0E-02 |
| M5005_Spy1329 | (A <sup>3</sup> )                | cysteine synthase                                              | <i>cysM</i>   | 3.54  | 1.0E-05 |
| M5005_Spy1334 |                                  | transporter                                                    | <i>yvqF</i>   | -1.13 | 1.0E-02 |
| M5005_Spy1340 |                                  | DNA-directed RNA polymerase omega chain                        |               | 2.04  | 1.9E-05 |
| M5005_Spy1341 |                                  | guanylate kinase                                               | <i>gmk</i>    | 1.23  | 4.2E-03 |
| M5005_Spy1342 |                                  | hydrolase, HAD superfamily                                     |               | 1.30  | 4.2E-04 |
| M5005_Spy1344 |                                  | acetyl-CoA acetyltransferase                                   | <i>atoB</i>   | -1.16 | 5.2E-04 |
| M5005_Spy1346 |                                  | acetate CoA-transferase beta subunit                           | <i>atoA</i>   | -1.44 | 6.9E-04 |
| M5005_Spy1347 |                                  | D-beta-hydroxybutyrate dehydrogenase                           |               | -1.76 | 1.0E-03 |
| M5005_Spy1348 |                                  | D-beta-hydroxybutyrate permease                                |               | -2.18 | 5.5E-08 |
| M5005_Spy1354 |                                  | recombination protein                                          | <i>recU</i>   | -1.14 | 3.5E-03 |
| M5005_Spy1356 | <i>cre</i>                       | aminopeptidase C                                               | <i>pepC</i>   | -1.25 | 1.8E-02 |
| M5005_Spy1359 |                                  | amino acid permease                                            |               | 1.36  | 1.8E-04 |
| M5005_Spy1362 |                                  | transporter                                                    |               | 1.78  | 4.0E-06 |
| M5005_Spy1363 |                                  | amino acid ABC transporter permease protein                    |               | 1.17  | 1.6E-03 |
| M5005_Spy1374 |                                  | hypothetical protein                                           |               | 1.17  | 1.4E-02 |
| M5005_Spy1376 | <i>cre</i> (R <sup>2,3,4</sup> ) | transaldolase                                                  |               | -2.82 | 1.0E-04 |
| M5005_Spy1377 | (R <sup>2,3,4</sup> )            | trans-acting positive regulator                                |               | -2.26 | 3.4E-03 |
| M5005_Spy1378 | <i>cre</i> (R <sup>2,3,4</sup> ) | NADH peroxidase                                                |               | -1.90 | 1.7E-02 |
| M5005_Spy1379 | (R <sup>2,3,4</sup> )            | glycerol uptake facilitator protein                            | <i>glpF</i>   | -4.84 | 1.0E-05 |
| M5005_Spy1380 | (R <sup>2,4</sup> )              | alpha-glycerophosphate oxidase                                 | <i>glpO</i>   | -4.44 | 2.1E-07 |
| M5005_Spy1381 | <i>cre</i> (R <sup>2,3,4</sup> ) | glycerol kinase                                                | <i>glpK</i>   | -4.13 | 5.4E-08 |
| M5005_Spy1391 |                                  | degV family protein                                            |               | -1.76 | 7.6E-06 |
| M5005_Spy1393 |                                  | hydrolase, HAD superfamily                                     |               | -1.17 | 5.1E-05 |
| M5005_Spy1395 | (R <sup>2,4</sup> )              | tagatose-bisphosphate aldolase; SpeB regulator                 | <i>lacD.1</i> | -2.93 | 2.7E-04 |
| M5005_Spy1396 | (R <sup>2</sup> )                | tagatose-6-phosphate kinase                                    | <i>lacC.1</i> | -2.29 | 6.0E-03 |
| M5005_Spy1397 | (R <sup>2,4</sup> )              | galactose-6-phosphate isomerase lacB subunit                   | <i>lacB.1</i> | -2.54 | 8.1E-04 |
| M5005_Spy1398 | (R <sup>2,4</sup> )              | galactose-6-phosphate isomerase lacA subunit                   | <i>lacA.1</i> | -2.63 | 4.2E-03 |
| M5005_Spy1399 | (R <sup>2,4</sup> )              | PTS system, <b>Galactose</b> -specific IIC component           |               | -2.16 | 2.1E-02 |
| M5005_Spy1408 |                                  | ribosome-binding factor A                                      | <i>rbfA</i>   | 1.44  | 2.4E-03 |
| M5005_Spy1409 |                                  | bacterial protein translation initiation factor 2              | <i>infB</i>   | 1.69  | 2.0E-04 |
| M5005_Spy1410 |                                  | LSU ribosomal protein L7AE                                     |               | 1.47  | 2.8E-04 |
| M5005_Spy1412 |                                  | N utilization substance protein A                              | <i>nusA</i>   | 1.09  | 4.2E-03 |
| M5005_Spy1420 |                                  | phage protein                                                  |               | 1.52  | 3.1E-03 |
| M5005_Spy1428 |                                  | phage protein                                                  |               | 1.79  | 3.1E-03 |
| M5005_Spy1432 |                                  | phage protein                                                  |               | 1.08  | 3.2E-02 |
| M5005_Spy1441 |                                  | phage terminase small subunit                                  |               | 1.52  | 1.3E-02 |
| M5005_Spy1442 |                                  | phage transcriptional activator                                |               | 2.16  | 2.7E-04 |
| M5005_Spy1444 |                                  | adenine-specific methyltransferase                             |               | 2.09  | 5.8E-03 |
| M5005_Spy1445 |                                  | phage protein                                                  |               | 2.05  | 5.4E-03 |
| M5005_Spy1447 |                                  | phage-related DNA helicase                                     |               | 1.20  | 2.0E-02 |
| M5005_Spy1448 | (R <sup>2</sup> )                | hypothetical protein                                           |               | 1.52  | 4.4E-02 |
| M5005_Spy1449 |                                  | DNA primase                                                    |               | 1.45  | 2.0E-02 |
| M5005_Spy1450 |                                  | phage-encoded DNA polymerase                                   |               | 1.45  | 7.7E-03 |
| M5005_Spy1454 |                                  | phage protein                                                  |               | 1.20  | 1.0E-02 |
| M5005_Spy1455 |                                  | phage protein                                                  |               | 1.60  | 1.5E-02 |
| M5005_Spy1459 |                                  | phage protein                                                  |               | 2.58  | 1.3E-03 |
| M5005_Spy1466 |                                  | phage protein                                                  |               | 1.29  | 3.2E-02 |
| M5005_Spy1472 |                                  | bis(5'-nucleosyl)-tetrphosphatase (asymmetrical)               | <i>hit</i>    | -1.32 | 2.2E-03 |
| M5005_Spy1476 |                                  | ATP/GTP hydrolase                                              |               | 1.16  | 2.2E-04 |
| M5005_Spy1477 | (R <sup>4</sup> )                | guanine-hypoxanthine permease                                  |               | 2.27  | 1.6E-05 |
| M5005_Spy1479 | <i>cre</i> (R <sup>3</sup> )     | PTS system, <b>Mannose</b> -specific IIAB; Primary Glucose PTS | <i>manL</i>   | 2.99  | 6.8E-05 |
| M5005_Spy1480 | <i>cre</i> (R <sup>3,4</sup> )   | PTS system, <b>Mannose</b> -specific IIC; Primary Glucose PTS  | <i>manM</i>   | 3.36  | 1.5E-05 |
| M5005_Spy1481 | (R <sup>3,4</sup> )              | PTS system, <b>Mannose</b> -specific IID; Primary Glucose PTS  | <i>manN</i>   | 2.78  | 4.1E-05 |
| M5005_Spy1482 |                                  | hypothetical cytosolic protein                                 | <i>manO</i>   | -0.97 | 3.1E-02 |
| M5005_Spy1493 |                                  | acyl carrier protein                                           | <i>acpP</i>   | 1.39  | 2.0E-02 |
| M5005_Spy1497 |                                  | chaperone protein                                              | <i>dnaJ</i>   | 1.27  | 3.3E-03 |
| M5005_Spy1504 |                                  | hypothetical membrane spanning protein                         |               | 1.14  | 2.4E-02 |
| M5005_Spy1508 |                                  | glutamyl-tRNA(Gln) amidotransferase subunit C                  | <i>gatC</i>   | 1.04  | 4.3E-04 |
| M5005_Spy1511 |                                  | pyrazinamidase/nicotinamidase                                  |               | 1.01  | 3.4E-02 |
| M5005_Spy1518 |                                  | transporter                                                    |               | 1.52  | 4.0E-03 |
| M5005_Spy1519 |                                  | ATP-dependent DNA helicase                                     | <i>recG</i>   | -1.14 | 5.2E-04 |
| M5005_Spy1520 |                                  | hypothetical protein                                           |               | -4.09 | 7.4E-04 |
| M5005_Spy1523 |                                  | ABC transporter, ATP-binding protein                           | <i>siaF</i>   | -1.09 | 6.9E-04 |
| M5005_Spy1533 |                                  | holo-[acyl-carrier protein] synthase                           | <i>alr</i>    | 1.13  | 8.5E-03 |
| M5005_Spy1538 | (R <sup>2</sup> )                | mannose-6-phosphate isomerase                                  | <i>pmi</i>    | -1.39 | 8.1E-04 |

|               |                                  |                                                       |               |       |          |
|---------------|----------------------------------|-------------------------------------------------------|---------------|-------|----------|
| M5005_Spy1539 | (R <sup>2</sup> )                | fructokinase                                          | <i>scrK</i>   | 1.59  | 4.6E-04  |
| M5005_Spy1553 |                                  | SSU ribosomal protein S18P                            | <i>rpsR</i>   | 1.93  | 1.2E-03  |
| M5005_Spy1559 |                                  | thioredoxin                                           | <i>trx</i>    | -1.26 | 2.8E-03  |
| M5005_Spy1569 | <i>cre</i>                       | formate acetyltransferase                             | <i>pfl</i>    | 2.57  | 4.0E-07  |
| M5005_Spy1574 |                                  | universal stress protein family                       |               | 8.91  | 1.6E-10  |
| M5005_Spy1575 | <i>cre</i> (A <sup>4</sup> )     | quinolone resistance protein                          | <i>norA</i>   | 9.81  | 1.4E-12  |
| M5005_Spy1581 |                                  | transcriptional regulator, MerR family                |               | 1.32  | 8.1E-03  |
| M5005_Spy1582 |                                  | DNA polymerase III, epsilon chain                     | <i>dnaQ</i>   | 1.26  | 6.5E-03  |
| M5005_Spy1598 | <i>cre</i>                       | hypothetical protein                                  |               | -1.38 | 2.1E-04  |
| M5005_Spy1606 |                                  | LSU ribosomal protein L28P                            | <i>rpmB</i>   | 2.04  | 1.7E-05  |
| M5005_Spy1610 | <i>cre2</i>                      | CTP synthase                                          | <i>pyrG</i>   | 2.63  | 7.9E-06  |
| M5005_Spy1611 |                                  | DNA-directed RNA polymerase delta chain               | <i>rpoE</i>   | 1.33  | 1.0E-04  |
| M5005_Spy1627 |                                  | ABC transporter permease protein                      | <i>salY</i>   | -1.16 | 5.1E-04  |
| M5005_Spy1644 | (R <sup>2</sup> )                | DNA integration/recombination/inversion protein       |               | 2.93  | 3.1E-02  |
| M5005_Spy1646 |                                  | SSU ribosomal protein S9P                             | <i>rpsI</i>   | 1.92  | 3.6E-04  |
| M5005_Spy1647 |                                  | LSU ribosomal protein L13P                            | <i>rplM</i>   | 1.51  | 1.3E-03  |
| M5005_Spy1661 | <i>cre</i> (R <sup>2,3,4</sup> ) | transaldolase                                         |               | -1.72 | 2.3E-03  |
| M5005_Spy1662 | (R <sup>2,4</sup> )              | putative transport protein                            |               | -1.70 | 1.1E-03  |
| M5005_Spy1664 | <i>cre</i> (R <sup>2,4</sup> )   | PTS system, <b>Mannitol</b> -specific IIA component   |               | -1.17 | 3.2E-02  |
| M5005_Spy1666 |                                  | SSU ribosomal protein S15P                            |               | 1.83  | 4.3E-04  |
| M5005_Spy1667 | (R <sup>2</sup> )                | hypothetical protein                                  |               | 1.58  | 1.2E-03  |
| M5005_Spy1671 |                                  | transcriptional regulator, MarR family                |               | -1.00 | 8.1E-03  |
| M5005_Spy1675 |                                  | phosphatidate cytidyltransferase                      | <i>cdsA</i>   | -1.21 | 5.1E-04  |
| M5005_Spy1691 | (R <sup>2</sup> )                | exodeoxyribonuclease III                              |               | -1.63 | 2.1E-04  |
| M5005_Spy1697 |                                  | 4-amino-4-deoxychorismate lyase                       |               | -1.09 | 3.0E-04  |
| M5005_Spy1698 |                                  | anthranilate synthase component II                    | <i>trpG</i>   | -1.45 | 1.2E-04  |
| M5005_Spy1699 |                                  | ATPase, AAA family                                    |               | -1.70 | 9.1E-06  |
| M5005_Spy1710 |                                  | streptococcal histidine triad protein                 |               | 3.01  | 4.2E-08  |
| M5005_Spy1711 |                                  | laminin binding lipoprotein; AdcR- repressed          | <i>lsp</i>    | 2.25  | 2.5E-05  |
| M5005_Spy1714 | (R <sup>2</sup> )                | Fn-binding surface protein; Mga-regulated             | <i>fba</i>    | 2.51  | 1.9E-03  |
| M5005_Spy1715 | (R <sup>2</sup> )                | C5A peptidase; Mga-regulated                          | <i>scpA</i>   | 2.20  | 2.6E-03  |
| M5005_Spy1716 |                                  | transposase                                           |               | -1.66 | 8.7E-05  |
| M5005_Spy1717 |                                  | transposase                                           |               | -2.47 | 1.0E-03  |
| M5005_Spy1718 |                                  | secreted inhibitor of complement; Mga-regulated       | <i>sic1.0</i> | 2.32  | 2.3E-03  |
| M5005_Spy1721 | <i>cre</i>                       | hypothetical protein; sORF upstream of <i>mga</i>     |               | -2.86 | 8.2E-03  |
| M5005_Spy1730 | (A <sup>3</sup> )                | hypothetical protein                                  |               | -1.45 | 1.5E-04  |
| M5005_Spy1736 |                                  | hypothetical protein                                  |               | -2.04 | 2.0E-02  |
| M5005_Spy1737 |                                  | Stand-alone transcriptional regulator Rgg, RopB       | <i>rgg</i>    | -1.43 | 1.0E-02  |
| M5005_Spy1738 | <i>cre</i> (R <sup>3</sup> )     | Secreted DNase-Streptodornase-chromosomal             | <i>spd</i>    | 1.45  | 8.4E-04  |
| M5005_Spy1741 | (R <sup>3</sup> )                | glycerol dehydrogenase                                | <i>gldA</i>   | -1.50 | 1.0E-04  |
| M5005_Spy1742 |                                  | transaldolase                                         | <i>mipB</i>   | -1.35 | 8.9E-04  |
| M5005_Spy1743 |                                  | formate acetyltransferase                             | <i>pflD</i>   | -1.35 | 2.0E-05  |
| M5005_Spy1745 | (R <sup>2,4</sup> )              | PTS system, <b>Cellobiose</b> -specific IIB component | <i>celB</i>   | -1.64 | 3.2E-02  |
| M5005_Spy1747 |                                  | sorbitol operon regulator                             |               | 1.07  | 2.7E-02  |
| M5005_Spy1765 |                                  | cold shock protein                                    | <i>csp</i>    | 1.67  | 7.8E-03  |
| M5005_Spy1768 | (R <sup>4</sup> )                | peroxiredoxin reductase (NAD(P)H)                     | <i>ahpC</i>   | -1.07 | 6.0E-03  |
| M5005_Spy1769 | (R <sup>4</sup> )                | peroxiredoxin reductase (NAD(P)H)                     | <i>ahpF</i>   | -1.24 | 5.7E-03  |
| M5005_Spy1770 | (R <sup>2,3,4</sup> )            | imidazolonepropionase                                 | <i>hutI</i>   | -5.24 | 1.0E-03  |
| M5005_Spy1771 | <i>cre</i> (R <sup>2,4</sup> )   | urocanate hydratase                                   | <i>hutU</i>   | -5.28 | 1.4E-02  |
| M5005_Spy1773 | (R <sup>2,4</sup> )              | formiminotetrahydrofolate cyclodeaminase              |               | -7.25 | 3.5E-03  |
| M5005_Spy1774 | (R <sup>2,4</sup> )              | formate--tetrahydrofolate ligase                      | <i>fhs.2</i>  | -7.37 | 2.1E-03  |
| M5005_Spy1775 | (R <sup>2,4</sup> )              | hypothetical cytosolic protein                        |               | -6.67 | 8.6 E-03 |
| M5005_Spy1776 | (R <sup>2,4</sup> )              | amino acid permease                                   |               | -7.13 | 3.5E-03  |
| M5005_Spy1777 | (R <sup>2,4</sup> )              | histidine ammonia-lyase                               | <i>hutH</i>   | -6.67 | 2.4E-03  |
| M5005_Spy1778 | (R <sup>2</sup> )                | formiminoglutamase                                    | <i>hutG</i>   | -1.82 | 6.1E-03  |
| M5005_Spy1780 |                                  | SSU ribosomal protein S2P                             | <i>rpsB</i>   | 1.79  | 3.3E-04  |
| M5005_Spy1781 |                                  | protein translation elongation factor Ts              |               | 1.72  | 5.7E-04  |
| M5005_Spy1782 |                                  | neutral endopeptidase                                 | <i>pepO</i>   | -1.38 | 2.1E-04  |
| M5005_Spy1783 |                                  | trehalose-6-phosphate hydrolase                       | <i>treC</i>   | -1.55 | 3.4E-04  |
| M5005_Spy1784 |                                  | PTS system, <b>Trehalose</b> -specific IIBC component | <i>treB</i>   | -0.95 | 3.6E-02  |
| M5005_Spy1786 |                                  | transcriptional regulator, MarR family                |               | 2.52  | 3.3E-04  |
| M5005_Spy1787 |                                  | glyoxalase family protein                             |               | -1.05 | 7.8E-03  |
| M5005_Spy1789 |                                  | anaerobic ribonucleoside-triphosphate reductase       | <i>nrdG</i>   | 1.44  | 2.4E-03  |
| M5005_Spy1790 |                                  | acetyltransferase                                     |               | 2.23  | 1.4E-02  |
| M5005_Spy1792 |                                  | hypothetical protein                                  |               | 1.02  | 2.5E-03  |
| M5005_Spy1797 |                                  | hypothetical cytosolic protein                        |               | -1.38 | 1.2E-04  |
| M5005_Spy1798 |                                  | suppressor of clpP & X SpxA homolog, allele 2         | <i>spxA2</i>  | -2.61 | 2.3E-04  |
| M5005_Spy1802 |                                  | holliday junction DNA helicase                        | <i>ruvA</i>   | -1.19 | 6.1E-04  |
| M5005_Spy1803 |                                  | multidrug resistance protein B                        | <i>lmrP</i>   | -1.12 | 1.7E-03  |

|               |                   |                                                                    |             |       |         |
|---------------|-------------------|--------------------------------------------------------------------|-------------|-------|---------|
| M5005_Spy1806 |                   | hypothetical cytosolic protein                                     |             | 1.45  | 3.8E-03 |
| M5005_Spy1810 |                   | hypothetical membrane spanning protein                             |             | 1.47  | 6.0E-03 |
| M5005_Spy1811 |                   | hypothetical membrane spanning protein                             |             | 2.32  | 1.0E-02 |
| M5005_Spy1812 |                   | hypothetical membrane spanning protein                             |             | 1.18  | 1.1E-02 |
| M5005_Spy1815 |                   | LSU ribosomal protein L32P                                         | <i>rpmF</i> | 2.49  | 1.2E-03 |
| M5005_Spy1821 |                   | hypothetical protein                                               |             | 1.20  | 3.4E-03 |
| M5005_Spy1823 |                   | integral membrane protein                                          |             | -1.65 | 1.0E-05 |
| M5005_Spy1830 |                   | transcriptional regulator, TetR family                             |             | 1.12  | 7.0E-03 |
| M5005_Spy1831 |                   | SSU ribosomal protein S4P                                          | <i>rpsD</i> | 1.43  | 2.5E-03 |
| M5005_Spy1834 |                   | hypothetical protein                                               |             | 1.49  | 1.2E-03 |
| M5005_Spy1840 | <i>cre</i>        | tRNA (5-methylaminomethyl-2-thiouridylate)-methyltransferase       | <i>trmU</i> | 1.32  | 2.4E-02 |
| M5005_Spy1841 | (A <sup>3</sup> ) | L-serine dehydratase                                               | <i>sdhB</i> | 3.26  | 1.1E-03 |
| M5005_Spy1842 |                   | L-serine dehydratase                                               | <i>sdhA</i> | 3.50  | 5.8E-04 |
| M5005_Spy1843 | (R <sup>2</sup> ) | transglycosylase SLT domain family protein                         |             | 2.76  | 1.2E-04 |
| M5005_Spy1847 |                   | CDP-diacylglycerol--glycerol-3-phosphate 3-phosphatidyltransferase |             | -0.96 | 1.4E-02 |
| M5005_Spy1849 |                   | zinc protease                                                      |             | -0.93 | 9.2E-03 |
| M5005_Spy1851 |                   | hyaluronan synthase                                                | <i>hasA</i> | 1.30  | 7.9E-04 |
| M5005_Spy1853 | <i>cre</i>        | UTP--glucose-1-phosphate uridylyltransferase                       | <i>hasC</i> | 1.24  | 2.2E-03 |
| M5005_Spy1862 | <i>cre</i>        | ABC transporter, permease protein                                  |             | -1.42 | 4.6E-05 |

<sup>a</sup>**cre**: presence of *cre* and *cre2* sites based on Debroy et al. <sup>1</sup>; (**ccpA**): identified as CcpA regulated in MIT1 transcriptome study of CcpA regulon; activated (**A**) or repressed (**R**) based on Shelburne et al. <sup>2</sup>, Kinkel et al. <sup>3</sup>, and Debroy et al. <sup>1</sup>.



**Supplemental Table S2: RNA-Seq results of the *mga* mutant in THY (WT/ $\Delta$ *mga*)**

| Spy Number    | Annotation                                                           | Gene   | Log <sub>2</sub> -FC | <i>p</i> value |
|---------------|----------------------------------------------------------------------|--------|----------------------|----------------|
| M5005_Spy0012 | hypoxanthine-guanine phosphoribosyltransferase                       |        | -1.73                | 4.0E-05        |
| M5005_Spy0013 | cell division protein                                                | ftsH   | -1.02                | 1.3E-03        |
| M5005_Spy0022 | phosphoribosylaminoimidazole-succinocarboxamide synthase             |        | -1.89                | 1.1E-05        |
| M5005_Spy0040 | alcohol dehydrogenase                                                | adhA   | 1.21                 | 5.1E-02        |
| M5005_Spy0041 | Na <sup>+</sup> driven multidrug efflux pump                         |        | -1.16                | 1.5E-04        |
| M5005_Spy0080 | bis(5'-nucleosyl)-tetraphosphatase (asymmetrical)                    |        | -1.09                | 4.9E-03        |
| M5005_Spy0113 | transposase                                                          |        | 1.47                 | 6.6E-03        |
| M5005_Spy0115 | hypothetical protein                                                 |        | 1.21                 | 2.2E-05        |
| M5005_Spy0117 | transcriptional regulator, LysR family                               |        | 2.06                 | 1.6E-04        |
| M5005_Spy0118 | transcriptional regulator, LysR family                               |        | 1.32                 | 2.7E-02        |
| M5005_Spy0143 | hypothetical protein                                                 |        | 2.54                 | 5.2E-03        |
| M5005_Spy0156 | metal-dependent hydrolase                                            |        | 1.16                 | 9.1E-03        |
| M5005_Spy0189 | hypothetical protein                                                 |        | 1.17                 | 4.6E-02        |
| M5005_Spy0212 | N-acetylmannosamine-6-phosphate 2-epimerase                          |        | 1.39                 | 2.0E-03        |
| M5005_Spy0213 | ABC <b>Sialic Acid</b> ; N-acetylneuraminate-binding protein         |        | 1.44                 | 2.9E-03        |
| M5005_Spy0260 | putative lipase                                                      |        | -1.04                | 1.5E-03        |
| M5005_Spy0261 | GTP-binding protein                                                  |        | -0.98                | 1.8E-02        |
| M5005_Spy0297 | transposase                                                          |        | 2.55                 | 1.5E-02        |
| M5005_Spy0313 | riboflavin transporter                                               |        | -1.20                | 1.4E-04        |
| M5005_Spy0318 | pyruvate formate-lyase activating enzyme                             | pflC   | 1.52                 | 8.2E-07        |
| M5005_Spy0319 | manganese-dependent inorganic pyrophosphatase                        | ppaC   | 0.90                 | 4.8E-05        |
| M5005_Spy0340 | L-lactate oxidase                                                    | lctO   | 2.47                 | 2.6E-04        |
| M5005_Spy0341 | lactocepin; SpyCEP; IL-8 protease                                    | spyCEP | 1.69                 | 4.9E-06        |
| M5005_Spy0344 | permease                                                             |        | -1.10                | 5.8E-04        |
| M5005_Spy0361 | phosphoglycerate transporter protein                                 |        | 1.01                 | 7.8E-03        |
| M5005_Spy0383 | D-alanyl-D-alanine carboxypeptidase                                  |        | -1.04                | 2.7E-03        |
| M5005_Spy0432 | acetyl-CoA acetyltransferase                                         |        | -1.22                | 4.4E-04        |
| M5005_Spy0456 | plasmid stabilization system antitoxin protein                       |        | -1.13                | 1.1E-02        |
| M5005_Spy0469 | hypothetical protein                                                 |        | -1.04                | 4.0E-03        |
| M5005_Spy0471 | hydrolase, HAD superfamily                                           |        | -1.09                | 3.4E-03        |
| M5005_Spy0494 | hypothetical protein                                                 |        | -1.19                | 4.3E-03        |
| M5005_Spy0518 | oligohyaluronate lyase                                               |        | 1.58                 | 2.8E-03        |
| M5005_Spy0519 | PTS system, <b>N-acetylgalactosamine</b> -specific IID               | agaD   | 1.02                 | 3.6E-02        |
| M5005_Spy0520 | PTS system, <b>N-acetylgalactosamine</b> -specific IIC               | agaS   | 1.89                 | 4.9E-05        |
| M5005_Spy0522 | unsaturated glucuronyl hydrolase                                     |        | 1.45                 | 8.6E-04        |
| M5005_Spy0549 | chorismate mutase                                                    |        | -1.15                | 3.8E-04        |
| M5005_Spy0585 | epuA protein                                                         | epuA   | -1.20                | 6.4E-03        |
| M5005_Spy0660 | fructose repressor                                                   | fruR   | 1.06                 | 1.8E-02        |
| M5005_Spy0667 | exotoxin type C precursor                                            |        | 2.07                 | 7.1E-03        |
| M5005_Spy0668 | IgG-degrading protease                                               | mac    | 1.62                 | 6.1E-04        |
| M5005_Spy0714 | hypothetical cytosolic protein                                       |        | -1.24                | 2.5E-04        |
| M5005_Spy0742 | hypothetical protein                                                 |        | -1.97                | 2.0E-05        |
| M5005_Spy0743 | ABC transporter substrate-binding protein                            |        | -1.59                | 1.8E-05        |
| M5005_Spy0744 | hypothetical protein                                                 |        | -1.55                | 2.6E-04        |
| M5005_Spy0745 | ABC transporter permease protein                                     |        | -1.26                | 3.8E-05        |
| M5005_Spy0746 | ABC transporter ATP-binding protein                                  |        | -1.47                | 5.9E-07        |
| M5005_Spy0780 | PTS system, <b>Mannose/Fructose</b> family IIA component             | ptsA   | 1.50                 | 6.8E-04        |
| M5005_Spy0781 | PTS system, <b>Mannose/Fructose</b> family IIB component             | ptsB   | 1.30                 | 7.2E-05        |
| M5005_Spy0782 | PTS system, <b>Mannose/Fructose</b> family IIC component             | ptsC   | 1.03                 | 1.4E-03        |
| M5005_Spy0786 | iron(III)-binding protein                                            |        | 0.89                 | 2.0E-03        |
| M5005_Spy0793 | Xaa-His dipeptidase                                                  |        | -1.04                | 4.8E-02        |
| M5005_Spy0797 | hypothetical protein                                                 |        | -2.85                | 1.4E-02        |
| M5005_Spy0798 | IFN-response binding factor 1                                        |        | -3.53                | 2.2E-04        |
| M5005_Spy0824 | 2-amino-4-hydroxy-6-hydroxymethylidihydropteridine pyrophosphokinase | folK   | -1.00                | 3.8E-04        |
| M5005_Spy0834 | Zn-dependent alcohol dehydrogenases and related dehydrogenases       |        | 1.20                 | 2.6E-03        |

|               |                                                                  |        |       |         |
|---------------|------------------------------------------------------------------|--------|-------|---------|
| M5005_Spy0853 | short chain dehydrogenase                                        |        | 0.96  | 7.1E-03 |
| M5005_Spy0858 | xanthine phosphoribosyltransferase                               | xpt    | -2.16 | 7.4E-05 |
| M5005_Spy0859 | xanthine permease                                                |        | -1.81 | 6.1E-06 |
| M5005_Spy0914 | phage transcriptional repressor                                  |        | -1.32 | 1.4E-04 |
| M5005_Spy0920 | UDP-N-acetylmuramoylpentapeptide-lysine N(6)-alanyltransferase   |        | -1.70 | 8.6E-05 |
| M5005_Spy0921 | ABC transporter ATP-binding protein                              |        | -1.54 | 8.4E-05 |
| M5005_Spy0932 | luciferase-like monooxygenase                                    |        | 0.94  | 1.6E-03 |
| M5005_Spy0933 | probable NADH-dependent flavin oxidoreductase                    |        | 1.00  | 6.8E-04 |
| M5005_Spy0934 | lipoate-protein ligase A                                         |        | 1.07  | 5.1E-04 |
| M5005_Spy0978 | hypothetical protein                                             |        | -1.17 | 6.3E-04 |
| M5005_Spy0985 | phnA protein                                                     |        | -1.39 | 6.1E-07 |
| M5005_Spy0986 | glucosamine--fructose-6-phosphate aminotransferase (isomerizing) | glmS   | -1.02 | 5.0E-04 |
| M5005_Spy1059 | ABC <b>Maltodextrin</b> permease protein                         | malF   | 0.94  | 2.8E-04 |
| M5005_Spy1062 | maltodextrose utilization protein                                | malA   | 1.49  | 4.1E-02 |
| M5005_Spy1063 | ABC <b>Cyclomaltodextrin</b> permease protein                    | malD   | 1.54  | 2.7E-02 |
| M5005_Spy1064 | ABC <b>Cyclomaltodextrin</b> permease protein                    | malC   | 1.38  | 2.3E-02 |
| M5005_Spy1065 | alpha-amylase                                                    | amyA   | 1.46  | 1.1E-02 |
| M5005_Spy1066 | neopullulanase/cyclomaltodextrinase/maltogenic alpha-amylase     | amyB   | 1.74  | 7.3E-03 |
| M5005_Spy1067 | ABC <b>Cyclomaltodextrin</b> -binding protein                    | malX   | 2.52  | 1.9E-05 |
| M5005_Spy1076 | Putative Bicarbonate transporter                                 | glnH   | -1.31 | 2.3E-03 |
| M5005_Spy1077 | Putative Bicarbonate transporter                                 | glnQ.2 | -1.04 | 1.3E-02 |
| M5005_Spy1082 | PTS system, <b>Cellobiose</b> -specific IIB component            |        | 1.16  | 3.0E-02 |
| M5005_Spy1083 | PTS system, <b>Cellobiose</b> -specific IIA component            |        | 1.00  | 1.1E-02 |
| M5005_Spy1084 | outer surface protein                                            |        | 1.02  | 1.8E-02 |
| M5005_Spy1085 | beta-glucosidase                                                 | bglA.2 | 1.46  | 2.3E-03 |
| M5005_Spy1093 | hypothetical protein                                             |        | 1.15  | 1.5E-02 |
| M5005_Spy1135 | oxalate/formate antiporter                                       |        | -1.16 | 3.9E-06 |
| M5005_Spy1148 | COME operon protein 1                                            |        | -1.32 | 2.0E-02 |
| M5005_Spy1165 | dihydroorotate dehydrogenase                                     | pyrD   | -1.19 | 4.5E-03 |
| M5005_Spy1194 | phage protein                                                    |        | -1.11 | 3.5E-03 |
| M5005_Spy1235 | phosphoglucomutase                                               |        | 1.14  | 9.2E-05 |
| M5005_Spy1261 | radical SAM family enzyme                                        |        | -1.25 | 2.9E-03 |
| M5005_Spy1274 | acetyltransferase                                                |        | 0.90  | 3.7E-02 |
| M5005_Spy1275 | arginine deiminase                                               | arcA   | 1.75  | 4.2E-03 |
| M5005_Spy1284 | cytochrome c-type biogenesis protein                             | ccdA   | 1.31  | 2.9E-02 |
| M5005_Spy1299 | hypothetical protein                                             |        | -2.03 | 3.1E-03 |
| M5005_Spy1314 | hyaluronoglucosaminidase                                         | hyl    | 0.85  | 1.0E-02 |
| M5005_Spy1315 | transcriptional regulator, GntR family                           |        | 1.18  | 3.0E-04 |
| M5005_Spy1316 | hypothetical protein                                             |        | 1.35  | 1.9E-03 |
| M5005_Spy1317 | alpha-mannosidase                                                |        | 1.16  | 5.5E-03 |
| M5005_Spy1340 | DNA-directed RNA polymerase omega chain                          |        | -1.50 | 1.7E-05 |
| M5005_Spy1347 | D-beta-hydroxybutyrate dehydrogenase                             |        | -0.97 | 9.1E-03 |
| M5005_Spy1376 | transaldolase                                                    |        | 1.00  | 5.2E-02 |
| M5005_Spy1377 | trans-acting positive regulator                                  |        | 1.09  | 5.7E-02 |
| M5005_Spy1387 | aldo/keto reductase family                                       |        | 1.35  | 2.4E-05 |
| M5005_Spy1397 | galactose-6-phosphate isomerase lacB subunit                     | lacB.1 | 1.10  | 5.0E-02 |
| M5005_Spy1477 | guanine-hypoxanthine permease                                    |        | -1.29 | 2.1E-04 |
| M5005_Spy1488 | biotin carboxyl carrier protein of acetyl-CoA                    | accB   | -1.20 | 1.6E-02 |
| M5005_Spy1489 | 3-oxoacyl-[acyl-carrier-protein] synthase                        | fabF   | -1.11 | 3.0E-02 |
| M5005_Spy1491 | malonyl-CoA-[acyl-carrier-protein] transacylase                  | fabD   | -1.21 | 4.9E-03 |
| M5005_Spy1492 | enoyl-[acyl-carrier protein] reductase (NADH)                    | fabK   | -1.13 | 1.8E-02 |
| M5005_Spy1569 | formate acetyltransferase                                        | pfl    | 1.06  | 8.6E-04 |
| M5005_Spy1572 | hypothetical membrane spanning protein                           |        | -1.36 | 1.4E-04 |
| M5005_Spy1587 | uridine phosphorylase                                            | udp    | 1.12  | 3.3E-05 |
| M5005_Spy1589 | transcriptional regulator, Cathelicidin resistance               | crgR   | -1.13 | 7.0E-03 |
| M5005_Spy1618 | competence-specific sigma factor                                 | comX.2 | -2.41 | 2.1E-02 |
| M5005_Spy1628 | ABC transporter ATP-binding protein                              |        | 1.40  | 3.7E-03 |
| M5005_Spy1629 | lantibiotic transport ATP-binding protein                        | salX   | 1.53  | 4.3E-03 |
| M5005_Spy1630 | serine (threonine) dehydratase                                   | salB   | 2.13  | 6.5E-06 |
| M5005_Spy1631 | lantibiotic salivaricin A                                        | salA   | 1.81  | 3.4E-02 |

|               |                                                     |        |       |         |
|---------------|-----------------------------------------------------|--------|-------|---------|
| M5005_Spy1632 | 6-phospho-beta-galactosidase                        | lacG   | 2.06  | 2.7E-03 |
| M5005_Spy1633 | PTS system, <b>Lactose</b> -specific IIBC component | lacE   | 2.12  | 4.3E-03 |
| M5005_Spy1634 | PTS system, <b>Lactose</b> -specific IIA component  | lacF   | 2.06  | 1.4E-02 |
| M5005_Spy1635 | tagatose-bisphosphate aldolase                      | lacD.2 | 2.11  | 5.4E-03 |
| M5005_Spy1636 | tagatose-6-phosphate kinase                         | lacC.2 | 2.52  | 1.5E-03 |
| M5005_Spy1637 | galactose-6-phosphate isomerase lacB subunit        | lacB.2 | 2.24  | 4.3E-03 |
| M5005_Spy1638 | galactose-6-phosphate isomerase lacA subunit        | lacA.2 | 1.99  | 2.1E-02 |
| M5005_Spy1644 | DNA integration/recombination/inversion protein     |        | -3.39 | 6.7E-04 |
| M5005_Spy1649 | hypothetical membrane spanning protein              |        | -1.00 | 2.9E-03 |
| M5005_Spy1682 | multiple sugar transport ATP-binding protein        | msmK   | 1.01  | 1.2E-03 |
| M5005_Spy1702 | mitogenic exotoxin Z                                | smeZ   | -1.15 | 1.8E-04 |
| M5005_Spy1705 | dipeptide transport system permease protein         | dppB   | -1.09 | 6.9E-03 |
| M5005_Spy1709 | hypothetical protein                                |        | -1.47 | 7.9E-04 |
| M5005_Spy1714 | Fn-binding surface protein; Mga-regulated           | fba    | 3.20  | 4.5E-06 |
| M5005_Spy1715 | C5A peptidase; Mga-regulated                        | scpA   | 3.43  | 2.1E-07 |
| M5005_Spy1717 | transposase                                         |        | -2.57 | 8.1E-06 |
| M5005_Spy1718 | secreted inhibitor of complement; Mga-regulated     | sic1.0 | 4.63  | 6.2E-09 |
| M5005_Spy1719 | M protein; Mga-regulated                            | emm1   | 9.08  | 8.6E-16 |
| M5005_Spy1720 | Multi-virulence gene regulator Mga                  | mga    | 4.60  | 2.8E-15 |
| M5005_Spy1721 | hypothetical protein                                |        | -2.78 | 6.4E-04 |
| M5005_Spy1733 | hypothetical protein                                |        | -2.54 | 4.2E-03 |
| M5005_Spy1734 | streptopain SpeB inhibitor                          | speI   | -2.94 | 3.1E-03 |
| M5005_Spy1735 | streptococcal pyrogenic exotoxin B                  | speB   | -2.73 | 2.1E-04 |
| M5005_Spy1738 | Secreted DNase-Streptodornase-chromosomal           | spd    | 0.98  | 2.2E-03 |
| M5005_Spy1750 | hypothetical protein                                |        | -1.14 | 2.5E-04 |
| M5005_Spy1758 | probable dipeptidase B                              |        | 1.09  | 5.3E-04 |
| M5005_Spy1759 | transcriptional regulator, MutR family              |        | -1.10 | 7.0E-03 |
| M5005_Spy1762 | 10 kDa chaperonin                                   | groES  | -1.04 | 7.1E-03 |
| M5005_Spy1779 | transcriptional regulator, LuxR family              |        | 1.55  | 1.5E-03 |
| M5005_Spy1798 | suppressor of clpP & X SpxA homolog, allele 2       | spxA2  | -1.86 | 3.0E-04 |
| M5005_Spy1809 | bacteriocin                                         | uviB   | -1.13 | 1.5E-03 |
| M5005_Spy1812 | hypothetical membrane spanning protein              |        | -1.01 | 3.0E-03 |
| M5005_Spy1828 | phage infection protein                             |        | -1.71 | 6.7E-07 |

**Supplemental Table S3: RNA-Seq results of the *mga* mutant in C Media (WT/ $\Delta$ *mga*)**

| <b>Spy Number</b> | <b>Annotation</b>                                          | <b>Gene</b> | <b>Log<sub>2</sub>-FC</b> | <b>p value</b> |
|-------------------|------------------------------------------------------------|-------------|---------------------------|----------------|
| M5005_Spy0009     | hypothetical protein                                       |             | 1.61                      | 4.9E-02        |
| M5005_Spy0030     | phosphoribosylaminoimidazole carboxylase catalytic subunit | purE        | 1.09                      | 2.9E-02        |
| M5005_Spy0036     | protein tyrosine phosphatase                               |             | -0.93                     | 4.0E-03        |
| M5005_Spy0091     | comG operon protein 6                                      | comYD       | 1.45                      | 1.4E-02        |
| M5005_Spy0106     | transcriptional regulator; Regulator of protein F          | rofA        | -1.09                     | 1.8E-04        |
| M5005_Spy0113     | transposase                                                |             | 1.32                      | 1.8E-02        |
| M5005_Spy0129     | V-type ATP synthase subunit C                              | ntpC        | -1.78                     | 6.7E-03        |
| M5005_Spy0130     | V-type sodium ATP synthase subunit F                       | ntpF        | -1.44                     | 8.8E-03        |
| M5005_Spy0131     | V-type sodium ATP synthase subunit A                       | ntpA        | -1.30                     | 1.4E-02        |
| M5005_Spy0132     | V-type sodium ATP synthase subunit B                       | ntpB        | -1.50                     | 1.2E-02        |
| M5005_Spy0133     | V-type sodium ATP synthase subunit D                       | ntpD        | -1.57                     | 8.5E-03        |
| M5005_Spy0136     | adenylosuccinate synthetase                                | purA        | -1.11                     | 2.9E-05        |
| M5005_Spy0139     | NAD glycohydrolase                                         | nga/spn     | 1.04                      | 4.6E-02        |
| M5005_Spy0140     | NAD glycohydrolase inhibitor                               | ifs         | 1.14                      | 4.9E-02        |
| M5005_Spy0141     | streptolysin O                                             | slo         | 1.12                      | 2.9E-02        |
| M5005_Spy0143     | hypothetical protein                                       |             | 3.35                      | 2.1E-03        |
| M5005_Spy0157     | glycine betaine transport ATP-binding protein              | opuAA       | 1.23                      | 4.8E-06        |
| M5005_Spy0167     | transposase                                                |             | 1.58                      | 2.9E-02        |
| M5005_Spy0183     | hypothetical membrane associated protein                   |             | 0.91                      | 5.4E-03        |
| M5005_Spy0202     | hypothetical protein                                       |             | -1.34                     | 6.9E-05        |
| M5005_Spy0247     | D-alanyl-D-alanine carboxypeptidase                        |             | 0.99                      | 1.3E-04        |
| M5005_Spy0257     | transposase                                                |             | -1.55                     | 2.2E-02        |
| M5005_Spy0279     | hypothetical protein                                       | lemA        | -0.91                     | 6.3E-04        |
| M5005_Spy0296     | acylphosphatase                                            |             | -1.04                     | 2.9E-04        |
| M5005_Spy0385     | 67 kDa Myosin-crossreactive antigen                        |             | -1.32                     | 6.1E-05        |
| M5005_Spy0403     | hypothetical protein                                       |             | 0.92                      | 4.6E-02        |
| M5005_Spy0422     | NAD(P)H-dependent quinone reductase                        |             | -1.11                     | 4.8E-05        |
| M5005_Spy0423     | Xaa-Pro dipeptidase                                        | pepQ        | -1.23                     | 4.7E-05        |
| M5005_Spy0477     | hypothetical membrane spanning protein                     | scfB        | -0.97                     | 2.8E-04        |
| M5005_Spy0478     | hypothetical membrane spanning protein                     | scfA        | -1.08                     | 6.0E-04        |
| M5005_Spy0486     | hypothetical protein                                       |             | -1.08                     | 2.6E-04        |
| M5005_Spy0522     | unsaturated glucuronyl hydrolase                           |             | 0.98                      | 5.0E-03        |
| M5005_Spy0527     | 4-hydroxy-2-oxoglutarate aldolase/                         | kgdA        | 1.03                      | 5.4E-04        |
| M5005_Spy0555     | hypothetical cytosolic protein                             |             | -1.09                     | 2.7E-04        |
| M5005_Spy0560     | transcriptional regulator                                  |             | -0.94                     | 1.4E-02        |
| M5005_Spy0562     | streptolysin S precursor                                   | sagA        | 1.33                      | 7.4E-04        |
| M5005_Spy0564     | streptolysin S biosynthesis protein                        | sagC        | 0.99                      | 6.8E-04        |
| M5005_Spy0565     | streptolysin S biosynthesis protein                        | sagD        | 1.09                      | 1.5E-04        |
| M5005_Spy0567     | streptolysin S biosynthesis protein                        | sagF        | 1.46                      | 1.1E-04        |
| M5005_Spy0568     | streptolysin S export ATP-binding protein                  | sagG        | 1.30                      | 2.5E-05        |
| M5005_Spy0569     | streptolysin S export transmembrane protein                | sagH        | 1.09                      | 3.4E-04        |
| M5005_Spy0570     | streptolysin S export transmembrane protein                | sagI        | 1.42                      | 1.3E-04        |
| M5005_Spy0571     | endonuclease/exonuclease/phosphatase family protein        |             | 1.21                      | 1.1E-06        |
| M5005_Spy0598     | large-conductance mechanosensitive channel                 | mscL        | -0.88                     | 2.6E-02        |
| M5005_Spy0615     | pore forming protein                                       | ebsA        | -1.03                     | 9.6E-04        |
| M5005_Spy0616     | ferredoxin                                                 |             | -2.15                     | 1.1E-03        |
| M5005_Spy0641     | aspartate carbamoyltransferase                             | pyrB        | 0.90                      | 5.7E-03        |
| M5005_Spy0651     | Heme-utilization cell surface protein                      | hupY        | 2.28                      | 4.6E-09        |
| M5005_Spy0652     | Heme-oxygenase cytosolic protein                           | hupZ        | 2.16                      | 5.2E-08        |
| M5005_Spy0668     | IgG-degrading protease                                     | mac         | 1.37                      | 1.2E-02        |
| M5005_Spy0679     | GTP pyrophosphokinase                                      |             | -1.01                     | 3.0E-04        |
| M5005_Spy0703     | orotidine 5'-phosphate decarboxylase                       | pyrF        | 1.15                      | 9.2E-03        |
| M5005_Spy0708     | uracil-DNA glycosylase                                     | ung         | -0.86                     | 4.1E-02        |
| M5005_Spy0715     | SSU ribosomal protein S1P                                  |             | 1.28                      | 9.4E-04        |
| M5005_Spy0720     | putative exfoliative toxin                                 |             | 0.86                      | 1.1E-02        |

|               |                                                                   |        |       |         |
|---------------|-------------------------------------------------------------------|--------|-------|---------|
| M5005_Spy0753 | dihydrolipoamide acetyltransferase pyruvate dehydrogenase complex | acoC   | -0.85 | 8.2E-04 |
| M5005_Spy0754 | hypothetical protein                                              |        | -1.50 | 5.8E-02 |
| M5005_Spy0755 | dihydrolipoamide dehydrogenase                                    | acoL   | -1.16 | 2.9E-05 |
| M5005_Spy0794 | tRNA (5-carboxymethylaminomethyl-2-thiouridylate) synthase        | thdF   | 1.10  | 2.7E-04 |
| M5005_Spy0820 | tetrahydropholate synth. /dihydrofolate synthase                  | folC.1 | -0.98 | 2.0E-05 |
| M5005_Spy0821 | tetrahydropholate synth., GTP cyclohydrolase I                    | folE   | -0.95 | 6.7E-05 |
| M5005_Spy0822 | tetrahydropholate synth., dihydropteroate synthase                | folP   | -0.92 | 5.7E-03 |
| M5005_Spy0824 | tetrahydropholate synth., pyrophosphokinase                       | folK   | -0.87 | 1.4E-3  |
| M5005_Spy0879 | hypothetical protein                                              |        | -1.52 | 7.9E-05 |
| M5005_Spy0880 | conserved membrane protein                                        |        | -2.45 | 2.5E-05 |
| M5005_Spy0881 | hypothetical cytosolic protein                                    |        | -1.93 | 5.2E-05 |
| M5005_Spy0890 | D-lactate dehydrogenase                                           | ddh    | 1.38  | 5.2E-03 |
| M5005_Spy0898 | 2-(5"-triphosphoribosyl)-3'-dephosphocoenzyme-A synthase          |        | 1.05  | 3.0E-02 |
| M5005_Spy1005 | phage protein                                                     |        | -1.47 | 2.1E-02 |
| M5005_Spy1035 | phage protein                                                     |        | 1.44  | 6.0E-02 |
| M5005_Spy1076 | Putative Bicarbonate transporter                                  | glnH   | -0.85 | 3.2E-02 |
| M5005_Spy1077 | Putative Bicarbonate transporter                                  | glnQ.2 | -1.04 | 1.0E-02 |
| M5005_Spy1093 | hypothetical protein                                              |        | -1.16 | 2.0E-04 |
| M5005_Spy1145 | superoxide dismutase                                              | sodA   | -0.93 | 5.7E-03 |
| M5005_Spy1169 | phage-encoded streptodornase; secreted DNase                      | spd3   | 2.35  | 1.0E-06 |
| M5005_Spy1170 | hypothetical membrane associated protein                          |        | 2.39  | 6.1E-07 |
| M5005_Spy1199 | phage protein                                                     |        | -1.87 | 9.6E-03 |
| M5005_Spy1211 | phage protein                                                     |        | 1.19  | 5.0E-02 |
| M5005_Spy1213 | phage protein                                                     |        | 1.28  | 7.5E-03 |
| M5005_Spy1227 | hypothetical protein                                              |        | 1.06  | 6.2E-05 |
| M5005_Spy1228 | DNA repair protein                                                | recN   | 0.99  | 6.7E-03 |
| M5005_Spy1229 | arginine repressor                                                | argR1  | 0.99  | 3.2E-02 |
| M5005_Spy1230 | hemolysin                                                         |        | 0.92  | 3.2E-02 |
| M5005_Spy1237 | arginine transport ATP-binding protein                            | artP   | 1.36  | 7.8E-04 |
| M5005_Spy1238 | arginine transport system permease protein                        | artQ   | 1.40  | 2.1E-04 |
| M5005_Spy1239 | hypothetical cytosolic protein                                    |        | 1.14  | 1.5E-02 |
| M5005_Spy1285 | CRISPR2-associated protein Cas2                                   | cas2   | 1.11  | 4.9E-04 |
| M5005_Spy1287 | CRISPR2-associated protein Cas4                                   | cas4   | 1.08  | 2.6E-04 |
| M5005_Spy1289 | CRISPR2-associated protein Cds1                                   | cds1   | 1.06  | 4.0E-07 |
| M5005_Spy1297 | phospho-2-dehydro-3-deoxyheptonate aldolase                       |        | 1.18  | 3.0E-03 |
| M5005_Spy1320 | regulatory protein                                                | recX   | -1.55 | 1.4E-05 |
| M5005_Spy1323 | transposase                                                       |        | 0.96  | 9.6E-03 |
| M5005_Spy1325 | ribosome-associated factor Y                                      |        | -1.16 | 5.8E-04 |
| M5005_Spy1369 | hypothetical protein                                              |        | 1.18  | 2.4E-02 |
| M5005_Spy1372 | ABC transporter permease protein                                  | proB   | 1.11  | 2.2E-04 |
| M5005_Spy1382 | hypothetical membrane associated protein                          |        | -1.40 | 1.4E-03 |
| M5005_Spy1400 | PTS system, Galactose-specific IIB component                      |        | -2.47 | 2.4E-03 |
| M5005_Spy1401 | PTS system, Galactose-specific IIA component                      |        | -2.66 | 2.9E-04 |
| M5005_Spy1407 | streptococcal secreted esterase Sse                               | sse    | 1.81  | 6.5E-04 |
| M5005_Spy1415 | phage-encoded streptodornase; Secreted DNase                      | sdaD2  | 2.22  | 8.7E-06 |
| M5005_Spy1440 | terminase large subunit                                           |        | 1.23  | 1.2E-02 |
| M5005_Spy1441 | phage terminase small subunit                                     |        | 1.12  | 3.4E-02 |
| M5005_Spy1514 | universal stress protein family                                   |        | -1.22 | 1.2E-03 |
| M5005_Spy1525 | conserved hypothetical protein                                    | siaD   | 1.09  | 2.2E-03 |
| M5005_Spy1526 | ABC transporter, ATP-binding protein, putative                    | siaC   | 1.33  | 7.5E-07 |
| M5005_Spy1527 | ABC transporter, ATP-binding protein, putative                    | siaB   | 1.39  | 1.2E-03 |
| M5005_Spy1528 | iron compound ABC transporter, ATP-binding protein                | siaA   | 1.44  | 9.5E-04 |
| M5005_Spy1529 | iron compound ABC transporter, permease protein                   | shp    | 1.22  | 6.6E-05 |
| M5005_Spy1530 | iron compound ABC transporter, substrate-binding protein          | shr    | 1.27  | 4.4E-07 |
| M5005_Spy1559 | thioredoxin                                                       | trx    | -0.96 | 9.7E-04 |
| M5005_Spy1590 | SSU ribosomal protein S14P                                        | rpsN2  | -1.22 | 7.5E-03 |
| M5005_Spy1622 | type I restriction-modification system specificity subunit        | hsdS   | 1.20  | 9.4E-07 |
| M5005_Spy1714 | Fn-binding surface protein; Mga-regulated                         | fba    | 4.79  | 8.7E-08 |
| M5005_Spy1715 | C5A peptidase precursor; Mga-regulated                            | scpA   | 5.04  | 2.9E-10 |

|               |                                                 |        |       |         |
|---------------|-------------------------------------------------|--------|-------|---------|
| M5005_Spy1716 | transposase                                     |        | -1.07 | 1.3E-04 |
| M5005_Spy1718 | secreted inhibitor of complement; Mga-regulated | sic1.0 | 5.53  | 2.1E-09 |
| M5005_Spy1719 | M protein; Mga-regulated                        | emm1   | 10.06 | 8.1E-17 |
| M5005_Spy1720 | Multi-virulence gene regulator Mga              | mga    | 5.84  | 4.2E-17 |
| M5005_Spy1721 | hypothetical protein                            |        | -5.00 | 2.4E-08 |
| M5005_Spy1727 | ABC transporter ATP-binding protein             |        | 0.99  | 1.0E-02 |
| M5005_Spy1731 | gene regulated by Mga; Mga-regulated            | grm    | 3.85  | 7.7E-05 |
| M5005_Spy1733 | hypothetical protein                            |        | 1.45  | 5.2E-02 |
| M5005_Spy1736 | hypothetical protein                            |        | -1.31 | 3.0E-02 |
| M5005_Spy1738 | Secreted DNase-Streptodornase-chromosomal       | spd    | 1.03  | 3.2E-04 |
| M5005_Spy1739 | hypothetical protein                            |        | -3.02 | 3.2E-05 |
| M5005_Spy1754 | translation initiation inhibitor                |        | -0.98 | 4.6E-02 |
| M5005_Spy1768 | peroxiredoxin reductase (NAD(P)H)               | ahpC   | -0.92 | 1.1E-03 |
| M5005_Spy1774 | formate--tetrahydrofolate ligase                | fhs.2  | 1.84  | 2.5E-02 |
| M5005_Spy1775 | hypothetical cytosolic protein                  |        | 1.59  | 5.0E-02 |
| M5005_Spy1776 | amino acid permease                             |        | 1.83  | 2.8E-02 |
| M5005_Spy1777 | histidine ammonia-lyase                         | hutH   | 2.16  | 9.1E-03 |
| M5005_Spy1778 | formiminoglutamase                              | hutG   | 1.01  | 9.6E-03 |
| M5005_Spy1798 | suppressor of clpP & X SpxA homolog, allele 2   | spxA2  | -1.07 | 1.7E-02 |
| M5005_Spy1823 | integral membrane protein                       |        | -0.88 | 3.5E-04 |
| M5005_Spy1843 | transglycosylase SLT domain family protein      |        | 1.33  | 4.5E-03 |

**Supplemental Table S4: PCR primers used in this study**

| <b>Target</b> | <b>Primer Name</b> | <b>Sequence (5'-3')<sup>† ^</sup></b>                   | <b>Reference</b> |
|---------------|--------------------|---------------------------------------------------------|------------------|
| <b>qPCR</b>   |                    |                                                         |                  |
| <i>gyrA</i>   | gyrA M1 RT-L       | C G A C T T G T C T G A A C G C C A A A G T             | 4                |
|               | gyrA M1 RT-R       | A T C A C G T T C C A A A C C A G T C A A A C           | 4                |
| <i>emm</i>    | emm1 RT-L          | A C T C C A G C T G T T G C C A T A A C A G             | 5                |
|               | emm1 RT-R          | G A G A C A G T T A C C A T C A A C A G G T G A A       | 5                |
| <i>sclA</i>   | sclA M1 RT-L       | T G C T G A C A A A G A A G C T A A C C A A A C         | 5                |
|               | sclA M1 RT-R       | C G T C T G T G G T T G T T G G C T A C A G             | 5                |
| <i>fruA</i>   | fruA M1 RT-L       | A C C G G G C T T A G T A G C T G G T                   | 6                |
|               | fruA M1 RT-R       | A C T T C T C C T C C T G C T G C A A                   | 6                |
| <i>sdaD2</i>  | sdaD2 M1T1 RT-L    | A G C A A A C C A G A G C C A A G T G                   | This study       |
|               | sdaD2 M1T1 RT-R    | C A C A T T T T T G G G G C T A T G C                   | This study       |
| <i>speB</i>   | speB M1 RT-L       | G G T A A A G T A G G C G G A C A T G C C               | 7                |
|               | speB M1 RT-R       | C A C C C C A A C C C C A G T T A A C A                 | 7                |
| <i>salB</i>   | salB M1T1 RT-L     | T G G T G T T T T A G C A G C A T T T T                 | This study       |
|               | salB M1T1 RT-R     | A A T C T C C G C C T G A A A C A A T                   | This study       |
| <i>mac</i>    | mac M1T1 RT-L      | A C G G C T A C C G C C T T A G T C T                   | This study       |
|               | mac M1T1 RT-R      | A C G G C G T C A A A A A T A C C A C                   | This study       |
| <i>opuAA</i>  | opuAA M1 RT-L      | T G A T T T G C A A G A C A G C A T G A                 | 7                |
|               | opuAA M1 RT-R      | C A T C A A A G C A A T C C G A T C A C                 | 7                |
| <i>ska</i>    | ska M1T1 RT-L      | T C G A A A C G G C A A G G T C T A C                   | This study       |
|               | ska M1T1 RT-R      | G C G C A C A T G T C C C T T T A A C                   | This study       |
| <i>sagC</i>   | sagC M1 RT-L       | T G C T G A T G C T T G A G G A T G A C                 | 3                |
|               | sagC M1 RT-R       | G C G C C A T A A A A C G G A A A T T A                 | 3                |
| <i>glnH</i>   | glnH M1 RT-L       | T G A G G G C A T T T C T A C T G G T G                 | This study       |
|               | glnH M1 RT-R       | G C A G C T A A G C C A T T G T T G A A                 | This study       |
| <i>slo</i>    | slo M1 RT-L        | T T G T T G A G G A T A A T G T A A G A A T G T T T A G | 3                |
|               | slo M1 RT-R        | T C C T G G C T T G C A A C T G A T T G                 | 3                |
| <b>PCR</b>    |                    |                                                         |                  |
| <i>mga</i>    | Mga InIn F         | ccc <b>GGATCCC</b> AGTGGAGAGAACTAAAATT                  | This study       |
|               | Mga InIn R         | ccc <b>GGATCC</b> TAAATTCCTCCAAAGAGTTGA                 | This study       |
| M13           | 1201               | AACAGCTATGACCATGATTACG                                  | Genewiz          |
|               | 1211               | GTTGTAAAACGACGGCCAGT                                    | Genewiz          |
| <i>aad9</i>   | SPR1               | ccc <b>CTCGAGA</b> AATAAAGCCCGCTTCGGCG                  | 8                |
|               | SPR2               | ccc <b>ACTAGT</b> AAGGACTTAAAAGAGCGTATTG                | 8                |

† Bold type denotes restriction site

^ Lowercase letters denote nucleotides not complementary to target DNA

## Supplemental References

- 1 DebRoy, S. *et al.* A Multi-Serotype Approach Clarifies the Catabolite Control Protein A Regulon in the Major Human Pathogen Group A Streptococcus. *Sci. Rep.* **6**, 32442, doi:10.1038/srep32442 (2016).
- 2 Shelburne, S. A., 3rd *et al.* A direct link between carbohydrate utilization and virulence in the major human pathogen Group A Streptococcus. *Proc. Natl. Acad. Sci. USA* **105**, 1698-1703 (2008).
- 3 Kinkel, T. L. & McIver, K. S. CcpA-mediated repression of streptolysin S expression and virulence in the Group A Streptococcus. *Infect. Immun.* **76**, 3451-3463 (2008).
- 4 Ribardo, D. A., Lambert, T. J. & McIver, K. S. Role of *Streptococcus pyogenes* two-component response regulators in the temporal control of Mga and the Mga-regulated virulence gene *emm*. *Infect. Immun.* **72**, 3668-3673 (2004).
- 5 Beres, S. B. *et al.* Molecular genetic anatomy of inter- and intraserotype variation in the human bacterial pathogen Group A Streptococcus. *Proc. Natl. Acad. Sci. USA* **103**, 7059-7064 (2006).
- 6 Valdes, K. M. *et al.* The *fruRBA* operon is necessary for Group A Streptococcal growth in fructose and for resistance to neutrophil killing during growth in whole human blood. *Infect. Immun.*, doi:10.1128/IAI.01296-15 (2016).
- 7 Leday, T. V. *et al.* TrxR, a new CovR-repressed response regulator that activates the Mga virulence regulon in Group A Streptococcus. *Infect. Immun.* **76**, 4659-4668 (2008).
- 8 Le Breton, Y. *et al.* Genome-wide identification of genes required for fitness of Group A Streptococcus in human blood. *Infect. Immun.* **81**, 862-875 (2013).
